# Supplementary material for: Geographical variation of chemical signals and odor discrimination in a wild mammal
Source: Research Square preprint supplement (doi:10.21203/rs.3.rs-8521869/v1), 2026-01-22
Supplement: Supplementary file 3 [file b359523b19c527798b80aed9.xlsx]

## Sheet: Sheet1
Research Data 2. The ratios of the peak areas of each compound in each sample (peak area of each compound divided by the area of the internal standard).
Region	Colony	Individual		ID	Aromatic compound	Aldehyde	Alkane	Ketone	Alcohol	Ester	Carboxylic acid	Alkene	Furan	Thiol
Eastern China_(EC)	Fanchang_(FC)	FC_A	EC	FC	0.00267466	0.0036666	0.00145363	0.00899595	0.0329698	0.00137923	0.00908691	0.0138297	0.00104986	2.26163e-08
Eastern China_(EC)	Fanchang_(FC)	FC_B	EC	FC	0.00125097	0.000761417	0.000403153	0.000385845	0.0345029	0.00117275	0.00280582	0.00286747	0.000270907	2.86352e-08
Eastern China_(EC)	Fanchang_(FC)	FC_C	EC	FC	0.000875149	0.00110158	0.00030577	0.00271176	0.0361317	0.00119063	0.01046	0.00218948	0.00025507	1.9638e-08
Eastern China_(EC)	Fanchang_(FC)	FC_D	EC	FC	0.000903157	0.00341488	0.00182418	0.00574649	0.0296135	0.00125777	0.00388819	0.0416684	0.000780758	1.72558e-08
Eastern China_(EC)	Fanchang_(FC)	FC_E	EC	FC	0.00249962	0.00112679	0.00109848	0.000599015	0.0315875	0.000759967	0.00988128	0.0182457	0.00031575	1.80384e-08
Eastern China_(EC)	Fanchang_(FC)	FC_F	EC	FC	0.00146528	0.00140893	0.000662138	0.000297502	0.0320044	0.000834611	0.00356673	0.00371848	0.000229411	1.70002e-08
Eastern China_(EC)	Fanchang_(FC)	FC_G	EC	FC	0.00190848	0.000805874	0.000701655	0.00190842	0.0328728	0.000930155	0.00743924	0.0124363	0.000206235	1.7116e-08
Eastern China_(EC)	Fanchang_(FC)	FC_H	EC	FC	0.00184931	0.00280256	0.000946233	0.00221372	0.0412676	0.00137361	0.00890863	0.0155816	0.000217327	2.28703e-08
Eastern China_(EC)	Fanchang_(FC)	FC_I	EC	FC	0.00293474	0.0015301	0.000788587	0.00392138	0.0361012	0.00147326	0.00520766	0.0151031	0.000672935	0.000207583
Eastern China_(EC)	Fanchang_(FC)	FC_J	EC	FC	0.00231285	0.00194547	0.000327455	0.000687672	0.0312222	0.00103183	0.00560334	0.00244395	0.000197742	2.15489e-08
Eastern China_(EC)	Chongyi_(CY)	CY_A	EC	CY	0.00116089	0.000632814	0.000463802	0.0017226	0.027866	0.0013467	0.00502295	0.00215546	0.000232653	5.37588e-05
Eastern China_(EC)	Chongyi_(CY)	CY_B	EC	CY	0.000985554	0.000430164	0.000408117	0.000995041	0.0262842	0.00120031	0.0037457	0.000673877	7.88211e-05	1.74945e-08
Eastern China_(EC)	Chongyi_(CY)	CY_C	EC	CY	0.00105841	0.000237036	0.000397984	0.000289746	0.0265805	0.00122846	0.00534447	0.00132295	0.000148971	6.25846e-05
Eastern China_(EC)	Chongyi_(CY)	CY_D	EC	CY	0.00133089	0.00214132	0.000885977	0.00150046	0.0287695	0.00132459	0.00608411	0.0111086	0.000702511	0.000135905
Eastern China_(EC)	Chongyi_(CY)	CY_E	EC	CY	0.00102514	0.0023187	0.00054263	0.00317129	0.0262543	0.00111659	0.00115063	0.00238839	0.000498316	6.21384e-05
Eastern China_(EC)	Chongyi_(CY)	CY_F	EC	CY	0.000761519	0.000368148	0.000359335	0.00185333	0.0276044	0.00131568	0.00132601	0.000851903	9.59541e-05	7.26949e-05
Eastern China_(EC)	Chongyi_(CY)	CY_G	EC	CY	0.000830431	0.000310648	0.000439614	0.00100414	0.0277611	0.000966671	0.00749881	0.00063609	0.000116143	7.603e-05
Eastern China_(EC)	Shaoguan_(SG)	SG_A	EC	SG	0.000466643	0.00192434	0.00182862	0.000249048	0.0249438	0.00114406	0.00286402	0.0334533	0.000820248	1.57952e-08
Eastern China_(EC)	Shaoguan_(SG)	SG_B	EC	SG	0.000864622	0.00162116	0.00119018	0.00680601	0.0273093	0.00123795	0.00400663	0.0196296	1.79913e-08	1.79913e-08
Eastern China_(EC)	Shaoguan_(SG)	SG_C	EC	SG	0.0027645	0.00302496	0.00113188	0.0061362	0.032451	0.0013431	0.00552125	0.0192442	0.000372462	0.000126175
Eastern China_(EC)	Shaoguan_(SG)	SG_D	EC	SG	0.00261274	0.00218511	0.00116621	0.00590863	0.0253135	0.00107001	0.00546448	0.0171714	0.000406645	0.000103612
Eastern China_(EC)	Shaoguan_(SG)	SG_E	EC	SG	0.00213595	0.00326489	0.00194375	0.00437163	0.0293016	0.00149959	0.00866785	0.0277015	0.000412286	0.000119249
Eastern China_(EC)	Shaoguan_(SG)	SG_F	EC	SG	0.00256578	0.000992806	0.00103321	0.00365861	0.026985	0.00125789	0.00364324	0.014912	0.00040358	5.79353e-05
Eastern China_(EC)	Shaoguan_(SG)	SG_G	EC	SG	0.000587497	0.00116955	0.000613656	0.00546283	0.0237998	0.00125312	0.0044442	0.00247773	0.000617883	0.000149585
Eastern China_(EC)	Shaoguan_(SG)	SG_H	EC	SG	0.00142379	0.0046587	0.00307908	0.00145385	0.0399607	0.0021544	0.0052956	0.0429245	0.00107955	2.68468e-08
Eastern China_(EC)	Shaoguan_(SG)	SG_I	EC	SG	0.00223254	0.00118572	0.001135	0.00353403	0.0242255	0.00135889	0.0102502	0.0159198	1.69283e-08	1.69283e-08
Eastern China_(EC)	Shaoguan_(SG)	SG_J	EC	SG	0.000644125	0.00154623	0.000201152	0.011299	0.0226546	0.0011619	0.00122425	0.000357517	0.00045241	0.000116991
Western China_(WC)	Hanzhong_(HZ)	HZ_A	WC	HZ	0.0023152	0.000553569	0.000722854	0.00379662	0.0265143	0.000853129	0.00208315	0.00570138	0.000390618	1.71946e-08
Western China_(WC)	Hanzhong_(HZ)	HZ_B	WC	HZ	0.00298174	0.000572327	0.000636807	0.00123649	0.0328024	0.00122084	0.00577001	0.00128689	0.000227113	1.92995e-08
Western China_(WC)	Hanzhong_(HZ)	HZ_C	WC	HZ	0.00249861	0.000327464	0.000684162	0.000413073	0.0316182	0.00125081	0.00418401	0.000859222	0.000283155	1.98014e-08
Western China_(WC)	Hanzhong_(HZ)	HZ_D	WC	HZ	0.00236257	0.000842228	0.000505498	0.00467463	0.030751	0.000979284	0.00270384	0.00148133	0.000374186	1.87647e-08
Western China_(WC)	Hanzhong_(HZ)	HZ_E	WC	HZ	0.00186111	0.000578166	0.000535518	0.00122004	0.0293422	0.000752459	0.00101546	0.000899891	0.000106629	1.74557e-08
Western China_(WC)	Hanzhong_(HZ)	HZ_F	WC	HZ	0.00164939	0.00106035	0.000776245	0.00102924	0.0273571	0.00120018	0.00690872	0.00375132	0.000376336	1.81655e-08
Western China_(WC)	Hanzhong_(HZ)	HZ_G	WC	HZ	0.00119662	0.000739845	0.000506188	0.00150482	0.0297173	0.000977041	0.00153508	0.00227265	0.000271402	1.72013e-08
Western China_(WC)	Hanzhong_(HZ)	HZ_H	WC	HZ	0.00401244	0.000616729	0.000853623	0.00830768	0.0305082	0.00140037	0.00519558	0.00162566	0.000341899	1.85479e-08
Western China_(WC)	Hanzhong_(HZ)	HZ_I	WC	HZ	0.00477874	0.00287116	0.000922574	0.00150819	0.0328868	0.00169008	0.00568953	0.0127019	0.000458902	6.60423e-05
Western China_(WC)	Hanzhong_(HZ)	HZ_J	WC	HZ	0.00472472	0.000504343	0.000569959	0.00565041	0.0423823	0.00188141	0.0111807	0.00292677	0.000411323	2.47529e-08
Western China_(WC)	Beichuan_(BC)	BC_A	WC	BC	0.00145512	0.000435198	0.00038247	0.00140787	0.0353755	0.00110787	0.0162238	0.00336814	0.000210176	2.06307e-08
Western China_(WC)	Beichuan_(BC)	BC_B	WC	BC	0.00231482	0.000956306	0.00045927	0.0069742	0.0317024	0.00103254	0.00505563	0.0044082	0.000533375	1.86401e-08
Western China_(WC)	Beichuan_(BC)	BC_C	WC	BC	0.00156718	0.000374692	0.000332945	0.00435879	0.031676	0.00114381	0.00811526	0.000803764	0.000240371	1.75157e-08
Western China_(WC)	Beichuan_(BC)	BC_D	WC	BC	0.00160396	0.00041796	0.000415254	0.000946145	0.0300668	0.000996962	0.0064261	0.002636	0.000308123	1.75543e-08
Western China_(WC)	Beichuan_(BC)	BC_E	WC	BC	0.00193615	0.000822619	0.000431293	0.00110016	0.0292873	0.00119138	0.00254757	0.00372196	0.000327473	1.70187e-08
Western China_(WC)	Beichuan_(BC)	BC_F	WC	BC	0.000695766	0.00035341	0.000472994	0.00307649	0.0313068	0.00132607	0.00261158	0.000990013	9.34835e-05	1.742e-08
Western China_(WC)	Beichuan_(BC)	BC_G	WC	BC	0.00210948	0.000599242	0.000533361	0.00147685	0.0318513	0.00110115	0.00691492	0.00590152	0.000171585	1.7391e-08
Western China_(WC)	Beichuan_(BC)	BC_H	WC	BC	0.00166893	0.000565632	0.000432513	0.00276293	0.0316094	0.00112854	0.00684212	0.00311851	0.000269227	1.80244e-08
Western China_(WC)	Beichuan_(BC)	BC_I	WC	BC	0.00291976	0.00129457	0.00068086	0.00839138	0.0320259	0.00121201	0.00489687	0.00941525	0.000627057	1.74046e-08
Western China_(WC)	Beichuan_(BC)	BC_J	WC	BC	0.00210667	0.000720442	0.000626172	0.00331995	0.0304099	0.00110294	0.00889316	0.00791339	0.000185483	1.78558e-08
Western China_(WC)	Jiangkou_(JK)	JK_A	WC	JK	0.00120957	0.000432506	0.000374106	0.00232044	0.0259145	0.000923237	0.000294837	0.00110184	0.000144918	1.71421e-08
Western China_(WC)	Jiangkou_(JK)	JK_B	WC	JK	0.00100901	0.000520588	0.000476179	0.00197485	0.0263686	0.00093187	0.00189934	0.0011079	0.000224595	1.72735e-08
Western China_(WC)	Jiangkou_(JK)	JK_C	WC	JK	0.00111037	0.00133568	0.00051722	0.00133274	0.0253358	0.00117239	0.00950722	0.00481986	0.000458669	6.24646e-05
Western China_(WC)	Jiangkou_(JK)	JK_D	WC	JK	0.00120301	0.000417417	0.000602645	0.00532271	0.0258695	0.00104206	0.00270142	0.00160826	0.000134648	1.65591e-08
Western China_(WC)	Jiangkou_(JK)	JK_E	WC	JK	0.00142907	0.000905321	0.000541371	0.000952363	0.0253576	0.000908228	0.000821497	0.00450991	0.000142441	1.62537e-08
Western China_(WC)	Jiangkou_(JK)	JK_F	WC	JK	0.00123625	0.000636314	0.000541324	0.000750534	0.0262834	0.00105103	0.00252648	0.00265729	6.58697e-05	6.60001e-05
Western China_(WC)	Jiangkou_(JK)	JK_G	WC	JK	0.0013485	0.00050546	0.000343788	0.000900006	0.0266986	0.000989996	0.00154186	0.00239001	0.000134206	1.69287e-08
Western China_(WC)	Jiangkou_(JK)	JK_H	WC	JK	0.0014629	0.000976236	0.000588432	0.00222738	0.0274245	0.00116892	0.00545122	0.00497844	0.000260715	9.96288e-05
Western China_(WC)	Jiangkou_(JK)	JK_I	WC	JK	0.00125445	0.000772203	0.000604546	0.00403556	0.0293814	0.00140233	0.0109285	0.00248302	0.00029988	6.74559e-05
Western China_(WC)	Jiangkou_(JK)	JK_J	WC	JK	0.00120077	0.00105672	0.000305285	0.00156958	0.0271105	0.00101341	0.00130463	0.00191487	0.000426655	6.32307e-05
Western China_(WC)	Anlong_(AL)	AL_A	WC	AL	0.00217429	0.00201965	0.000789652	0.00108719	0.0266343	0.000923056	0.00037208	0.00668244	0.000426362	0.000107869
Western China_(WC)	Anlong_(AL)	AL_B	WC	AL	0.00278455	0.00241485	0.00104652	0.00654139	0.0265653	0.00090085	0.000399256	0.0217886	0.0002691	1.7277e-08
Western China_(WC)	Anlong_(AL)	AL_C	WC	AL	0.00197347	0.00080522	0.000607602	0.00112379	0.0280889	0.00100302	0.00274914	0.0107166	5.09222e-05	0.000177145
Western China_(WC)	Anlong_(AL)	AL_D	WC	AL	0.0014899	0.00243802	0.000633909	0.00617414	0.0257018	0.000922531	0.00193646	0.0044159	0.000687673	0.000143333
Western China_(WC)	Anlong_(AL)	AL_E	WC	AL	0.00100005	0.00053977	0.000395871	0.00107637	0.026429	0.000906364	0.000308754	0.0027362	6.98798e-05	8.48267e-05
Western China_(WC)	Anlong_(AL)	AL_F	WC	AL	0.000768417	0.000380785	0.000504237	0.000890967	0.0264371	0.000880343	0.00540411	0.0012305	0.000108445	0.000101056
Western China_(WC)	Anlong_(AL)	AL_G	WC	AL	0.00115371	0.0024275	0.000822532	0.000937262	0.0272721	0.000814691	0.00136613	0.0150025	0.000174083	0.000120974
Western China_(WC)	Anlong_(AL)	AL_H	WC	AL	0.00111026	0.00184937	0.000624694	0.00220663	0.0256103	0.000820178	0.000569886	0.00766732	0.000399164	0.000130373
Western China_(WC)	Anlong_(AL)	AL_I	WC	AL	0.000926703	0.00106802	0.000442642	0.00315655	0.0274839	0.000737317	0.00405055	0.00225498	0.000172055	0.000122285
Western China_(WC)	Anlong_(AL)	AL_J	WC	AL	0.000716267	0.00126032	0.000403855	0.00170628	0.0270412	0.000740657	0.000561278	0.00411865	0.000210907	0.00017649
Southern Yunnan_(SY)	Hekou_(HK)	HK_A	SY	HK	0.00201126	0.00251826	0.00176987	0.00111748	0.0243306	0.00102509	0.00348609	0.000257543	0.000169666	0.000126594
Southern Yunnan_(SY)	Hekou_(HK)	HK_B	SY	HK	0.00275553	0.00309232	0.00117654	0.00159689	0.0254369	0.00104613	0.000808794	0.0238012	0.000607987	1.57058e-08
Southern Yunnan_(SY)	Hekou_(HK)	HK_C	SY	HK	0.0024873	0.00189588	0.000941594	0.0043023	0.0396683	0.00141922	0.00521167	0.0104618	0.000274574	2.25737e-08
Southern Yunnan_(SY)	Hekou_(HK)	HK_D	SY	HK	0.00283379	0.0028802	0.00164649	0.00681208	0.0308652	0.00123676	0.00878423	0.0320719	0.000477194	1.82739e-08
Southern Yunnan_(SY)	Hekou_(HK)	HK_E	SY	HK	0.00190324	0.00133684	0.000528135	0.00630697	0.029849	0.00133566	0.00371726	0.0044024	0.000258708	1.8016e-08
Southern Yunnan_(SY)	Hekou_(HK)	HK_F	SY	HK	0.00163077	0.000379595	0.000405953	0.00107973	0.0300615	0.000992516	0.00919518	0.00168146	7.29112e-05	6.52317e-05
Southern Yunnan_(SY)	Hekou_(HK)	HK_G	SY	HK	0.00159484	0.000978097	0.000536818	0.00112464	0.0250968	0.000919783	0.00327195	0.0062386	0.000965931	1.66794e-08
Southern Yunnan_(SY)	Hekou_(HK)	HK_H	SY	HK	0.0018493	0.0030642	0.000438345	0.001088	0.0255106	0.00100509	0.00413428	0.000208439	0.000653134	8.76988e-05
Southern Yunnan_(SY)	Hekou_(HK)	HK_I	SY	HK	0.00349659	0.00117356	0.000279471	0.00296218	0.0238729	0.000944643	0.00815305	1.54308e-08	1.54308e-08	1.54308e-08
Southern Yunnan_(SY)	Hekou_(HK)	HK_J	SY	HK	0.00238001	0.00317975	0.001336	0.00110022	0.0255837	0.00105444	0.00540386	0.0213704	0.000891692	0.00012562
Southern Yunnan_(SY)	Simao_(SM)	SM_A	SY	SM	0.00132287	0.00311093	0.000916827	0.00175624	0.0254686	0.00127821	0.000572211	0.0104581	0.000919239	1.66212e-08
Southern Yunnan_(SY)	Simao_(SM)	SM_B	SY	SM	0.0027772	0.00115597	0.000516525	0.00152204	0.0226976	0.00104672	0.000186867	0.000204888	0.00021312	0.000104262
Southern Yunnan_(SY)	Simao_(SM)	SM_C	SY	SM	0.00301674	0.00232074	0.00117402	0.00285676	0.0239115	0.000197131	0.00615822	0.0218154	0.00105614	9.34017e-05
Southern Yunnan_(SY)	Simao_(SM)	SM_D	SY	SM	0.00162308	0.0025069	0.000750498	0.00613079	0.0247573	0.000953045	0.000246463	0.011897	0.000696713	5.75456e-05
Southern Yunnan_(SY)	Simao_(SM)	SM_E	SY	SM	0.00140786	0.00265322	0.0012533	0.00218854	0.0257744	0.00106145	0.00117706	0.0276747	0.000397496	7.45518e-05
Southern Yunnan_(SY)	Simao_(SM)	SM_F	SY	SM	0.00145528	0.00119933	0.00108848	0.00198087	0.0226853	0.00112055	0.00259023	0.0201762	0.000149604	7.14413e-05
Southern Yunnan_(SY)	Simao_(SM)	SM_G	SY	SM	0.0015609	0.00172014	0.000726737	0.0011915	0.0234728	0.00104287	0.000400532	0.0106866	0.000427417	0.000141221
Southern Yunnan_(SY)	Simao_(SM)	SM_H	SY	SM	0.00185318	0.00257247	0.00104989	0.000281198	0.0226702	0.00126205	5.32428e-05	0.0266418	0.000204905	0.000165439
Southern Yunnan_(SY)	Simao_(SM)	SM_I	SY	SM	0.00166036	0.00129103	0.000640661	0.00108511	0.0254125	0.00107016	0.00190897	0.0081057	0.0001998	0.000130163
Southern Yunnan_(SY)	Simao_(SM)	SM_J	SY	SM	0.00175641	0.00173422	0.00169456	0.00154811	0.0235483	0.00109505	0.00710495	0.000320404	0.000253929	0.00010758
