# Supplementary material for: Geographical variation of chemical signals and odor discrimination in a wild mammal
Source: Research Square preprint supplement (doi:10.21203/rs.3.rs-8521869/v1), 2026-01-22
Supplement: Supplementary file 4 [file e17e3180f80ee2c45290c67d.xlsx]

## Sheet: Sheet1
Table S3. Eigenvalues, variance components, and compound component loadings for a principal component analysis of chemical components of gland secretions in Hipposideros armiger. Bold values indicate the highest loadings associated with a particular component (P < 0.05).
Number	Compounds	PC1	PC2	PC3	PC4	PC5	PC6	PC7	PC8
1	Methanethiol	-0.083	-0.882	-0.059	-0.215	-0.088	-0.34	0.072	0.191
2	Acetaldehyde	0.178	0.621	-0.233	-0.214	0.486	0.372	0.164	0.284
3	Heptane, 4-methyl-	0.258	0.268	-0.753	0.458	-0.055	-0.27	0.062	0.072
4	Heptane, 2,4-dimethyl-	-0.427	0.396	-0.427	0.47	-0.073	-0.415	-0.175	0.221
5	Acetone	0.105	0.78	-0.529	0.163	0.169	-0.175	-0.001	-0.126
6	Ethyl Acetate	0.807	0.045	-0.496	-0.174	-0.173	0.195	0.042	-0.034
7	Ethanol	0.345	0.776	0.334	0.251	-0.069	-0.007	-0.27	0.164
8	Heptane, 4-ethyl-2,2,6,6-tetramethyl-	0.444	-0.433	-0.409	0.227	0.596	0.109	0.169	-0.031
9	2,3-Butanedione	0.552	0.454	-0.503	0.092	0.356	-0.229	-0.083	-0.204
10	Octane, 3,3-dimethyl-	-0.484	-0.26	0.463	0.346	0.534	0.128	0.242	-0.055
11	Heptane, 5-ethyl-2,2,3-trimethyl-	-0.432	-0.267	0.652	0.315	0.263	0.258	0.113	0.263
12	Octane, 3-ethyl-	-0.586	-0.286	0.273	0.542	0.259	0.002	0.324	0.186
13	Hexanal	-0.298	0.317	0.787	-0.037	0.406	-0.079	0.009	-0.137
14	Decane, 6-ethyl-2-methyl-	0.58	0.649	0.376	0.273	-0.015	-0.154	-0.024	0.043
15	Hexanal, 2-methyl-	0.017	-0.56	0.272	0.203	0.336	0.375	-0.561	-0.048
16	2-Pentanol, 2-methyl-	0.254	0.499	-0.732	0.289	0.065	-0.231	0.058	0.076
17	Benzene, 1,3-dimethyl-	0.224	0.626	0.683	-0.007	0.123	-0.19	-0.185	0.073
18	2-Pentenal, 2-methyl-	0.349	-0.802	0.181	0.2	-0.167	-0.007	-0.005	0.367
19	1-Butanol	0.235	-0.023	0.316	-0.409	-0.416	0.614	0.272	-0.232
20	2-Pentene, 3-ethyl-2-methyl-	0.724	-0.42	-0.465	0.097	-0.172	-0.08	0.164	0.107
21	Pyridine	0.667	0.331	-0.428	-0.28	0.11	-0.165	0.342	0.165
22	Heptanal, 2-methyl-	0.104	-0.706	0.349	0.072	0.571	0.067	0.071	-0.17
23	1-Butanol, 3-methyl-	0.717	-0.25	-0.604	-0.003	-0.11	0.212	-0.037	-0.015
24	4-Butyl-cyclohexanone	0.689	-0.34	0.209	-0.446	0.391	-0.039	-0.087	-0.072
25	Furan, 2,3-dihydro-4-(1-methylethyl)-	0.653	-0.689	-0.19	0.084	0.068	0.189	0.102	-0.074
26	2-Pentenal, 2-ethyl-	0.672	-0.562	0.361	0.258	-0.037	-0.1	0.154	0.025
27	2-Hexenal, 2-ethyl-	0.628	-0.085	0.583	0.377	-0.201	0.247	0.067	-0.098
28	Benzene, 1-methyl-3-(1-methylethyl)-	0.627	0.411	0.008	0.162	0.299	-0.352	0.434	0.101
29	4-Methyl-1,6-heptadien-4-ol	-0.304	-0.545	-0.035	0.15	0.096	0.552	0.514	0.094
30	Acetoin	0.824	0.221	-0.449	-0.097	-0.019	-0.022	-0.232	-0.078
31	2-Octanone	-0.52	-0.641	-0.26	-0.44	0.231	-0.051	-0.01	-0.044
32	Pyridine, 2-(1-methylethyl)-	0.602	-0.092	0.686	0.026	0.123	-0.002	-0.377	0.028
33	Tridecane	-0.024	0.134	-0.803	-0.167	0.246	-0.088	-0.355	0.337
34	Undecanal, 2-methyl-	0.658	-0.453	0.059	0.303	0.125	0.42	-0.253	-0.102
35	Dodecane, 2,7,10-trimethyl-	0.104	0.434	-0.331	0.661	-0.131	0.333	-0.265	-0.237
36	Butanoic acid, 2-methyl-, 2-methyl-2-propenyl ester	-0.497	0.827	-0.187	0.006	0.001	0.045	0.144	0.103
37	4-Decenal, (E)-	0.596	-0.725	0.152	0.101	0.173	0.132	-0.177	-0.09
38	Cyclohexanone, 4-ethyl-	0.532	-0.664	0.144	0.224	-0.223	0.249	-0.267	0.152
39	2-Heptenal, 2-methyl-	0.784	-0.478	-0.009	0.125	-0.265	0.098	0.137	0.206
40	2-Pentanone, 4-hydroxy-4-methyl-	-0.528	0.443	0.023	-0.306	-0.374	0.297	0.361	-0.269
41	Pyridine, 2-propyl-	0.538	0.155	0.636	-0.127	0.441	-0.25	-0.028	-0.09
42	o-Toluic acid, tridec-2-ynyl ester	0.853	-0.269	0.039	-0.129	0.065	-0.404	0.114	-0.024
43	Nonanal	0.7	0.554	0.137	-0.362	0.034	-0.188	-0.025	0.124
44	Pyridine, 2-ethyl-6-methyl-	0.831	-0.063	0.266	-0.167	0.396	-0.181	-0.018	-0.132
45	Tetradecane	-0.127	0.335	0.576	0.677	-0.159	-0.126	0.059	0.192
46	Cyclopentanol, 2-methyl-	-0.538	0.443	0.357	-0.36	-0.194	0.344	0.305	-0.089
47	Cyclopentane, 2-isopropyl-1,3-dimethyl-	0.636	-0.705	-0.067	0.044	0.094	-0.13	-0.249	0.066
48	4-Nonenal, (E)-	0.621	-0.754	-0.024	0.079	0.171	-0.082	0.038	0.033
49	1-Pentadecene, 2-methyl-	0.701	-0.416	-0.004	0.217	-0.226	-0.315	0.085	0.363
50	Acetic acid	0.524	0.484	0.489	-0.268	-0.271	0.297	-0.118	-0.07
51	Cyclodecane	0.557	-0.602	-0.307	0.033	0.127	0.365	0.278	0.076
52	Octadecane	-0.116	0.807	-0.334	0.334	0.053	-0.101	0.297	0.104
53	Pyridine, 2-butyl-	0.583	0.376	0.47	-0.077	0.447	-0.282	-0.098	-0.046
54	2-Methyl-6-propylpyridine	0.22	0.388	0.69	-0.285	0.475	-0.119	-0.069	0.005
55	2-Methyl-oct-2-enedial	-0.271	-0.828	-0.25	0.133	0.272	-0.29	0.052	0.025
56	Benzaldehyde	0.64	0.069	-0.452	0.001	-0.537	0.158	0.022	-0.259
57	Propanoic acid	0.521	0.637	0.257	0.122	-0.158	0.46	-0.044	-0.053
58	Bicyclo[3.1.1]heptane-2-carboxaldehyde, 6,6-dimethyl-	0.414	0.486	-0.651	0.308	0.109	-0.064	0.217	0.102
59	cis-7-Decen-1-al	0.139	-0.773	0.083	0.19	0.495	0.287	-0.069	0.09
60	Bicyclo[3.1.1]heptan-2-one, 6,6-dimethyl-, (1R)-	0.592	0.272	0.418	0.328	-0.447	-0.042	0.22	0.209
61	3-Pentenoic acid, 4-methyl-	0.35	0.58	-0.6	0.209	0.343	0.043	0.108	-0.078
62	3-methyl-2-pentylpyridine	0.308	0.412	0.518	-0.277	0.604	0.118	-0.102	-0.014
63	2,4-Octadienal, (E,E)-	0.736	-0.588	-0.177	0.17	-0.062	-0.011	-0.199	-0.087
64	Butanedioic acid, dimethyl ester	0.49	0.418	0.717	0.125	-0.22	-0.077	0.022	-0.022
65	2-(2,3-Dimethyloxiran-2-yl)pyridine	0.968	0.125	0.116	0.067	-0.023	-0.161	0.023	0.053
66	Eicosane	-0.277	-0.306	-0.119	0.737	-0.075	-0.371	0.114	-0.34
67	6-Methyl-6-hepten-4-yn-3-ol	0.43	-0.818	0.142	0.14	0.299	0.075	0.102	0.011
68	2-Cyclohexen-1-one, 3,5-dimethyl-	-0.452	0.308	0.308	0.445	0.584	-0.125	0.218	0.067
69	Benzaldehyde, 4-methyl-	0.489	0.081	-0.296	0.67	0.165	0.166	0.002	-0.403
70	Bicyclo[3.1.1]hept-2-ene-2-carboxaldehyde, 6,6-dimethyl-	-0.434	0.013	0.085	0.111	0.064	-0.302	0.536	-0.639
71	Butanoic acid	0.462	0.793	0.179	0.223	-0.035	0.264	-0.053	0.034
72	Acetophenone	-0.332	0.024	-0.804	-0.319	0.353	0.122	0.007	0.028
73	Butanoic acid, 3-methyl-	0.263	0.871	-0.032	-0.038	0.192	0.265	-0.248	0.032
74	5-Hydroxymethyldihydrofuran-2-one	-0.194	0.76	0.449	0.143	0.4	-0.029	0.036	0.016
75	2,2-Dimethylocta-3,4-dienal	0.797	-0.545	0.14	0.192	-0.004	0.037	-0.048	-0.082
76	2-Octylcyclopropene-1-heptanol	0.733	-0.454	-0.402	-0.134	0.167	-0.028	0.192	-0.108
77	Benzaldehyde, 2,5-dimethyl-	0.83	-0.059	-0.476	0.081	-0.228	-0.054	0.137	0.013
78	cis-Decalin, 2-syn-methyl-	0.832	-0.44	-0.208	0.023	0.131	0.082	0.156	-0.151
79	Benzenemethanol, dimethyl-	-0.494	-0.593	0.1	0.501	-0.354	0.033	-0.127	-0.031
80	Benzaldehyde, 2,4-dimethyl-	-0.424	0.135	-0.311	0.657	0.407	0.141	-0.297	0.005
81	Cyclohexene, 3-(bromomethyl)-	0.848	-0.481	-0.013	0.019	0.109	-0.032	0.135	-0.135
82	Benzaldehyde, 4-propyl-	-0.31	0.186	0.655	-0.027	0.296	0.511	0.219	0.204
83	2-Propenal, 3-phenyl-	0.613	0.606	-0.432	-0.229	0.116	0.045	-0.037	0.028
84	Naphthalene, 2-methyl-	0.904	0.376	-0.128	-0.053	0.013	0.023	0.142	-0.038
85	Hexanoic acid	0.188	0.389	-0.34	0.072	-0.002	0.773	-0.021	0.309
86	Benzofuran, 2-methyl-	0.186	0.751	-0.495	-0.061	0.094	0.236	-0.262	-0.138
87	4-Ethylbenzoic acid, tridec-2-ynyl ester	0.919	0.354	0.017	0.092	-0.08	0.08	-0.023	-0.091
88	Benzaldehyde, 2,4,5-trimethyl-	-0.674	0.299	-0.302	0.331	0.143	0.105	0.034	-0.471
89	L-Alanyl-L-norleucine, N-dimethylaminomethylene-, methyl ester	0.664	-0.05	0.355	-0.432	-0.043	-0.017	0.484	0.087
90	1-Dodecanol	-0.709	0.099	-0.108	0.588	0.349	0.09	-0.015	0
91	2-Cyclopenten-1-one, 2-(2-butenyl)-3-methyl-, (Z)-	0.853	-0.306	0.076	0.191	0.19	0.201	0.12	-0.215
92	Ethanedicarboxamide, N-(3,5-dimethylphenyl)-N'-[2-(1-piperazinyl)ethyl]-	0.589	0.286	0.136	-0.5	0.386	-0.078	0.381	0.046
93	Phenol	-0.018	0.885	-0.024	0.375	-0.055	0.092	0.24	0.079
94	1,1'-Biphenyl, 4-methyl-	0.871	0.095	0.207	0.215	-0.351	-0.068	0.125	-0.022
95	3-Butylisobenzofuran-1(3H)-one	0.851	0.475	-0.209	-0.015	-0.015	0.027	-0.014	-0.073
96	1(3H)-Isobenzofuranone	0.776	0.545	-0.045	0.116	0.194	0.097	0.172	0.093
97	Phenol, 2,4,6-tri-tert-butyl-	0.456	0.208	0.711	0.368	-0.302	-0.115	0.062	-0.018
98	1,2-Benzenedicarboxylic acid, bis(2-methylpropyl) ester	-0.259	-0.176	-0.563	0.42	0.139	0.375	0.394	0.305
99	Succinic acid, 2-methylpent-3-yl 2,2,3,3,3-pentafluoropropyl ester	0.473	0.219	0.704	0.352	-0.302	-0.113	0.062	-0.018
100	Phthalic acid, butyl isoporpyl ester	0.795	0.516	0.073	0.06	0.205	0.192	-0.115	0.026
101	Isophthalic acid, hexyl tridec-2-ynyl ester	0.456	0.208	0.711	0.368	-0.302	-0.115	0.062	-0.018
102	Benzamide	0.808	0.469	-0.231	0.024	0.193	0.012	-0.184	0.041
	Eigenvalue	32.0927	24.8237	16.6689	8.57365	7.4275	5.47754	4.18155	2.75445
	Proportion variance	31.4635	24.337	16.3421	8.40554	7.28186	5.37014	4.09956	2.70044
