# Supplementary material for: Geographical variation of chemical signals and odor discrimination in a wild mammal
Source: Research Square preprint supplement (doi:10.21203/rs.3.rs-8521869/v1), 2026-01-22
Supplement: Supplementary file 5 [file edeb9a93f4bd4e4dce2266b9.xlsx]

## Sheet: Sheet1
Research Data 1. The ratios of the peak areas of each compound in each sample (peak area of each compound divided by the area of the internal standard)
Region	Colony	Individual	ID	Methanethiol	Acetaldehyde	Heptane, 4-methyl-	Heptane, 2,4-dimethyl-	Acetone	Ethyl Acetate	Ethanol	Heptane, 4-ethyl-2,2,6,6-tetramethyl-	2,3-Butanedione	Octane, 3,3-dimethyl-	Heptane, 5-ethyl-2,2,3-trimethyl-	Octane, 3-ethyl-	Hexanal	Decane, 6-ethyl-2-methyl-	Hexanal, 2-methyl-	2-Pentanol, 2-methyl-	Benzene, 1,3-dimethyl-	2-Pentenal, 2-methyl-	1-Butanol	2-Pentene, 3-ethyl-2-methyl-	Pyridine	Heptanal, 2-methyl-	1-Butanol, 3-methyl-	4-Butyl-cyclohexanone	Furan, 2,3-dihydro-4-(1-methylethyl)-	2-Pentenal, 2-ethyl-	2-Hexenal, 2-ethyl-	Benzene, 1-methyl-3-(1-methylethyl)-	4-Methyl-1,6-heptadien-4-ol	Acetoin	2-Octanone	Pyridine, 2-(1-methylethyl)-	Tridecane	Undecanal, 2-methyl-	Dodecane, 2,7,10-trimethyl-	Butanoic acid, 2-methyl-, 2-methyl-2-propenyl ester	4-Decenal, (E)-	Cyclohexanone, 4-ethyl-	2-Heptenal, 2-methyl-	2-Pentanone, 4-hydroxy-4-methyl-	Pyridine, 2-propyl-	o-Toluic acid, tridec-2-ynyl ester	Nonanal	Pyridine, 2-ethyl-6-methyl-	Tetradecane	Cyclopentanol, 2-methyl-
Eastern China_(EC)	Fanchang_(FC)	FC_A	FC	2.26163e-08	2.26163e-08	0.000418895	0.000713681	0.000624399	0.0015039	0.287657	0.00339025	0.00266199	2.26163e-08	0.00325116	0.000511588	0.000226083	0.000449649	0.00240415	0.00311392	2.26163e-08	0.00207078	0.00127548	0.000212721	2.26163e-08	0.00407588	0.000208219	0.00161294	0.00120241	0.0167853	0.00079847	2.26163e-08	0.000347823	0.0721483	0.00672352	0.000395054	0.000552198	0.00113617	0.000489535	0.00057858	0.00618357	0.00257984	0.00588928	0.000610218	0.0018011	8.02407e-05	0.00127678	0.0404951	0.00211312	0.0026786
Eastern China_(EC)	Fanchang_(FC)	FC_B	FC	2.86352e-08	2.86352e-08	2.86352e-08	0.000426408	0.000176842	0.000321512	0.30693	2.86352e-08	0.000855365	2.86352e-08	0.000339331	2.86352e-08	0.00013955	0.000166873	2.86352e-08	0.000645284	0.00132757	0.00121064	0.00124159	2.86352e-08	0.000423548	2.86352e-08	2.86352e-08	0.000140873	2.86352e-08	0.000531022	2.86352e-08	0.000269216	6.82646e-05	2.86352e-08	2.86352e-08	2.86352e-08	0.000633661	2.86352e-08	2.86352e-08	2.86352e-08	0.00202721	0.000235758	0.000917279	0.00043552	0.00117419	2.86352e-08	0.00106113	0.00576802	0.00135534	0.00113522
Eastern China_(EC)	Fanchang_(FC)	FC_C	FC	1.9638e-08	0.00141737	1.9638e-08	0.000255679	0.000133293	0.00167529	0.32237	0.00049609	0.000760559	1.9638e-08	1.9638e-08	1.9638e-08	0.000148883	0.000148897	1.9638e-08	1.9638e-08	0.00130813	0.000681368	0.00122294	7.97076e-05	0.000567599	1.9638e-08	1.9638e-08	0.00012361	0.000222496	0.00327178	0.00104082	0.000327624	1.9638e-08	0.0136101	0.00951775	1.9638e-08	1.9638e-08	0.000416344	1.9638e-08	0.000269644	0.00177029	0.00047736	0.00479774	0.000468175	0.000245368	5.25808e-05	0.00144524	0.00540739	0.00143562	0.00137453
Eastern China_(EC)	Fanchang_(FC)	FC_D	FC	1.72558e-08	1.72558e-08	1.72558e-08	0.000754007	0.000297919	0.00310501	0.259043	0.000550213	0.00207975	0.000371745	0.00076643	0.000200147	0.000199438	0.000204578	1.72558e-08	0.00173048	1.72558e-08	0.00320476	0.0010428	0.000324822	0.000482757	0.000966029	1.72558e-08	1.72558e-08	0.000960586	0.0103409	0.000375183	0.000302853	9.77868e-05	0.0507796	1.72558e-08	0.00143357	1.72558e-08	0.000838221	0.000341568	0.000392388	0.00688878	0.0017895	0.0167299	0.000482886	0.00251747	1.72558e-08	0.00110937	1.72558e-08	0.00127123	0.00190759
Eastern China_(EC)	Fanchang_(FC)	FC_E	FC	1.80384e-08	0.00189187	1.80384e-08	0.000228507	0.000158654	0.000200489	0.281522	0.00139396	0.000160163	0.000314108	0.000917905	1.80384e-08	0.000145017	0.000123545	1.80384e-08	1.80384e-08	0.00115312	0.000715305	0.000841418	1.80384e-08	0.000377999	1.80384e-08	1.80384e-08	0.00143141	0.000181113	0.00223347	0.000131905	0.000215435	3.03094e-05	0.00196416	1.80384e-08	1.80384e-08	1.80384e-08	0.000411381	0.000427524	1.80384e-08	0.00156189	0.000399197	0.00529586	0.000129498	0.00167467	1.80384e-08	0.00125173	0.0406721	0.0011894	8.04431e-05
Eastern China_(EC)	Fanchang_(FC)	FC_F	FC	1.70002e-08	1.70002e-08	0.000197479	0.00223136	0.000227799	0.000244527	0.284155	0.000726349	0.000893287	0.000502361	0.00145502	5.64634e-05	0.000182571	0.00012493	1.70002e-08	0.00105358	0.00103798	0.000156444	0.00109785	1.70002e-08	0.000369704	1.70002e-08	1.70002e-08	0.000247	1.70002e-08	0.000821327	0.000474207	0.000346828	0.000153065	1.70002e-08	1.70002e-08	0.00102754	0.000320269	1.70002e-08	0.00028255	1.70002e-08	0.00382964	0.000166033	0.00149668	0.000352247	0.000820023	0.000145445	0.001752	0.00925957	0.00118764	0.00118529
Eastern China_(EC)	Fanchang_(FC)	FC_G	FC	1.7116e-08	1.7116e-08	1.7116e-08	0.000506702	0.000238434	0.000494197	0.291196	0.00110722	0.00049822	0.000175228	0.00057969	1.7116e-08	0.000323312	0.000191728	1.7116e-08	0.00116427	0.000616009	0.000777428	0.00113138	7.66461e-05	1.7116e-08	1.7116e-08	1.7116e-08	0.00133745	0.000167478	0.00166022	9.36906e-05	8.53846e-05	7.95052e-05	0.00648553	0.00786016	0.000139205	0.00040641	1.7116e-08	0.000235701	0.000205361	0.000896335	0.000422772	0.00418014	0.00038256	0.000504937	1.7116e-08	0.00148961	0.0151605	0.00108729	0.00126437
Eastern China_(EC)	Fanchang_(FC)	FC_H	FC	2.28703e-08	2.28703e-08	2.28703e-08	0.000593107	0.000514879	0.000761227	0.365333	2.28703e-08	0.000740209	0.000515223	0.000602233	2.28703e-08	0.000393551	0.000320625	0.00315777	0.000996881	2.28703e-08	0.00254014	0.00235037	2.28703e-08	2.28703e-08	0.00176214	2.28703e-08	0.00189313	0.00043463	0.00681814	0.000264931	2.28703e-08	2.28703e-08	0.00908449	0.00753844	2.28703e-08	2.28703e-08	0.00101832	0.000404013	0.000502194	0.00582253	0.000767153	0.0086708	0.00042562	0.00119189	0.000177919	0.0012187	0.0101725	0.00196084	0.00105504
Eastern China_(EC)	Fanchang_(FC)	FC_I	FC	0.000207583	2.29249e-08	2.29249e-08	0.000472941	0.000589459	0.000977562	0.321505	2.29249e-08	0.000707012	0.000272589	0.000754345	2.29249e-08	0.000276343	0.000214066	2.29249e-08	2.29249e-08	2.29249e-08	0.000399023	0.00167664	2.29249e-08	2.29249e-08	2.29249e-08	2.29249e-08	2.29249e-08	0.000192199	0.00288126	0.000909118	2.29249e-08	2.29249e-08	0.0274897	0.00759374	0.00079493	2.29249e-08	0.000261337	0.000527817	0.000563171	0.00223022	0.000435785	0.00502584	0.000507933	0.00126494	0.000193627	0.00127856	0.0331709	0.0016615	0.00117881
Eastern China_(EC)	Fanchang_(FC)	FC_J	FC	2.15489e-08	0.000940685	2.15489e-08	0.00026724	0.000295592	0.000581268	0.272458	0.00053415	0.000465553	0.000244839	0.000255843	2.15489e-08	0.000171302	0.000314449	2.15489e-08	2.15489e-08	2.15489e-08	0.00255073	0.000962366	0.000113309	0.000585088	0.010067	2.15489e-08	0.00161576	0.000395462	0.00479384	0.000548497	2.15489e-08	2.15489e-08	2.15489e-08	2.15489e-08	0.00246844	0.000444864	0.00355197	2.15489e-08	2.15489e-08	2.15489e-08	2.15489e-08	0.0062345	0.000201834	0.00432589	0.000149892	0.00106002	0.0196691	0.00162326	2.15489e-08
Eastern China_(EC)	Chongyi_(CY)	CY_A	CY	5.37588e-05	1.75981e-08	0.000159424	0.00154601	0.00035533	0.000762978	0.243295	1.75981e-08	0.000600591	0.000357491	0.00135043	0.000180518	0.000182866	1.75981e-08	1.75981e-08	0.00176349	0.000162816	0.000272968	0.00145113	0.000144634	0.000429249	1.75981e-08	1.75981e-08	0.00010757	0.000136144	0.00165723	0.000117224	0.000161815	0.000200003	0.00410971	0.00749658	0.000124223	0.00030297	1.75981e-08	1.75981e-08	0.00128641	0.000106954	0.000763037	0.00526554	0.00110118	0.000223106	1.75981e-08	0.000637355	0.0032178	0.00102252	0.00331306
Eastern China_(EC)	Chongyi_(CY)	CY_B	CY	1.74945e-08	0.00290543	1.74945e-08	0.000794862	1.74945e-08	0.000335729	0.232254	0.00073549	0.00018062	0.000378453	0.0011098	0.00016584	1.74945e-08	1.74945e-08	1.74945e-08	0.000716695	0.00017055	8.81882e-05	0.0011527	1.74945e-08	0.000281192	1.74945e-08	1.74945e-08	1.74945e-08	1.74945e-08	1.74945e-08	2.91371e-05	1.74945e-08	0.000178544	1.74945e-08	0.00805721	1.74945e-08	1.74945e-08	1.74945e-08	1.74945e-08	0.000671292	1.74945e-08	0.000114182	0.000731758	0.000954677	5.09131e-05	1.74945e-08	0.000477757	0.00126361	0.00128375	0.0013416
Eastern China_(EC)	Chongyi_(CY)	CY_C	CY	6.25846e-05	1.73358e-08	8.91075e-05	0.000775136	0.000345707	0.00121126	0.234252	1.73358e-08	1.73358e-08	0.000251962	0.00109616	9.65601e-05	0.000167418	1.73358e-08	1.73358e-08	0.000995278	0.000184787	7.41524e-05	0.00116352	1.73358e-08	1.73358e-08	1.73358e-08	1.73358e-08	0.000117436	1.73358e-08	0.000274463	1.73358e-08	9.35359e-05	5.43853e-05	1.73358e-08	1.73358e-08	1.73358e-08	0.000639958	1.73358e-08	1.73358e-08	0.000861956	6.27692e-05	1.73358e-08	0.000756076	0.000974765	1.73358e-08	1.73358e-08	0.000773021	0.00170231	0.00129019	0.00231851
Eastern China_(EC)	Chongyi_(CY)	CY_D	CY	0.000135905	0.000637914	0.000214428	0.00180872	0.000262238	1.83593e-08	0.246516	0.00115255	1.83593e-08	0.000401468	0.00107935	0.000148765	0.000149467	1.83593e-08	1.83593e-08	0.00176204	0.000222743	0.00350438	0.001882	0.00012116	0.000305769	1.83593e-08	1.83593e-08	0.000751548	0.000795606	0.00789338	0.000519289	1.83593e-08	0.000188087	1.83593e-08	0.00980639	0.000195219	1.83593e-08	0.000262186	0.000531266	0.00133484	0.00324101	0.00098004	0.00909478	0.00126091	0.000460912	1.83593e-08	0.00111763	0.00268384	0.00141571	0.00298542
Eastern China_(EC)	Chongyi_(CY)	CY_E	CY	6.21384e-05	1.70017e-08	2.81314e-05	0.000698786	0.000289765	0.000879555	0.231325	0.00143748	0.00102724	0.00046908	0.0012732	0.000202198	0.000133784	1.70017e-08	1.70017e-08	0.000741986	0.000122378	0.00532499	0.0012011	0.000186203	0.000409095	0.00115634	1.70017e-08	0.000755595	0.00072012	0.00693963	0.000709466	8.30926e-05	0.000250898	0.0169909	0.00934786	1.02852e-06	0.000477571	1.70017e-08	1.70017e-08	1.70017e-08	0.000620409	0.00125896	0.0130903	0.000551414	0.000141808	1.70017e-08	0.000768858	0.00101312	0.00136372	0.00127519
Eastern China_(EC)	Chongyi_(CY)	CY_F	CY	7.26949e-05	1.73509e-08	4.96677e-05	0.000618755	0.00021596	0.00107726	0.244008	0.000911191	0.000261302	1.73509e-08	0.000637466	8.39394e-05	8.30175e-05	1.73509e-08	1.73509e-08	0.00079006	0.000185019	0.000253749	0.000936196	5.03312e-05	1.73509e-08	1.73509e-08	1.73509e-08	1.73509e-08	1.73509e-08	0.000581032	0.000107905	4.1432e-05	0.000122632	0.00961075	0.00676931	1.73509e-08	0.000532875	1.73509e-08	1.73509e-08	0.00170774	6.7285e-05	0.000101213	0.0014033	0.000614916	1.73509e-08	1.73509e-08	0.000876544	0.000848016	0.00115964	0.00203871
Eastern China_(EC)	Chongyi_(CY)	CY_G	CY	7.603e-05	0.00184946	1.76173e-08	0.000361651	0.000179622	0.000334215	0.247031	0.00155592	0.00016778	1.76173e-08	0.000486396	1.76173e-08	0.00014964	1.76173e-08	1.76173e-08	0.000458887	0.000230969	1.76173e-08	0.00101284	1.76173e-08	0.000422552	1.76173e-08	1.76173e-08	1.76173e-08	1.76173e-08	0.000113125	1.76173e-08	5.65859e-05	5.24016e-05	0.00186006	0.00669343	1.76173e-08	0.000530622	1.76173e-08	0.000623514	0.000353265	1.76173e-08	1.76173e-08	0.00038982	0.000295092	1.32257e-05	1.76173e-08	0.000876756	0.000838261	0.00143804	0.000955345
Eastern China_(EC)	Shaoguang_(SG)	SG_A	SG	1.57952e-08	0.000701214	1.57952e-08	0.000453992	1.57952e-08	0.00269776	0.217062	0.00207703	1.57952e-08	1.57952e-08	1.57952e-08	1.57952e-08	1.57952e-08	1.57952e-08	1.57952e-08	0.0015542	1.57952e-08	1.57952e-08	0.00137194	1.57952e-08	0.000406291	1.57952e-08	1.57952e-08	1.57952e-08	0.00164048	1.57952e-08	0.000711606	1.57952e-08	0.000103366	1.57952e-08	1.57952e-08	1.57952e-08	0.000302898	1.57952e-08	0.000162621	1.57952e-08	0.00892116	0.0021084	1.57952e-08	0.000381952	1.57952e-08	1.57952e-08	1.57952e-08	1.57952e-08	1.57952e-08	0.000211646
Eastern China_(EC)	Shaoguang_(SG)	SG_B	SG	1.79913e-08	0.000567155	0.000464204	0.000198766	0.000474137	0.00203282	0.239611	1.79913e-08	0.00276705	1.79913e-08	1.79913e-08	1.79913e-08	1.79913e-08	0.000145317	1.79913e-08	0.00140385	0.0011703	0.000661777	0.00114612	1.79913e-08	0.000641754	0.000223004	0.000529526	0.0023372	1.79913e-08	0.00189857	0.000134507	1.79913e-08	0.00026249	0.0551017	0.00653812	1.79913e-08	0.000293752	1.79913e-08	1.79913e-08	1.79913e-08	0.00391123	0.000360693	0.0045703	0.000224836	1.79913e-08	0.000249624	1.79913e-08	1.79913e-08	0.00135359	1.79913e-08
Eastern China_(EC)	Shaoguang_(SG)	SG_C	SG	0.000126175	0.000654077	0.000442938	0.000186051	0.0004282	0.00271336	0.286468	0.00216437	0.00241719	1.84889e-08	1.84889e-08	1.84889e-08	1.84889e-08	8.39124e-05	0.000790627	0.00347531	1.84889e-08	0.00305037	1.84889e-08	0.000153478	0.00057984	1.84889e-08	0.000635947	0.00203485	0.000744905	0.00703019	0.000327308	7.52441e-05	6.91577e-05	0.0451037	0.00926621	9.86891e-05	1.84889e-08	1.84889e-08	0.000632842	0.000379146	0.00338215	0.00146291	0.0115822	0.000279806	0.00307727	0.000232394	0.0018993	0.0284639	0.00127604	1.84889e-08
Eastern China_(EC)	Shaoguang_(SG)	SG_D	SG	0.000103612	1.58212e-08	0.000555392	0.000301541	0.000868111	0.0029927	0.220751	0.00248858	0.00314411	1.58212e-08	1.58212e-08	1.58212e-08	1.58212e-08	1.58212e-08	1.58212e-08	0.00281791	1.58212e-08	0.000594341	0.00123221	8.23551e-05	0.000532023	1.58212e-08	0.00103105	0.000702304	0.000813274	0.00899377	0.000163776	0.000124315	0.000212903	0.044964	0.0077166	1.58212e-08	0.00039296	1.58212e-08	0.000488989	1.58212e-08	0.0110637	0.00117073	0.00947505	0.000264342	1.58212e-08	1.58212e-08	0.00102318	0.0312038	0.00131219	4.8636e-05
Eastern China_(EC)	Shaoguang_(SG)	SG_E	SG	0.000119249	0.00109546	1.87101e-08	0.00205759	1.87101e-08	0.00299857	0.253997	0.0020004	1.87101e-08	1.87101e-08	1.87101e-08	1.87101e-08	1.87101e-08	1.87101e-08	1.87101e-08	0.00504961	1.87101e-08	0.00119589	0.00162564	0.000291283	0.000474146	1.87101e-08	0.00207621	0.00124284	0.000824554	0.0103736	1.87101e-08	0.000134206	1.87101e-08	0.0345164	0.00573145	1.87101e-08	0.000571072	1.87101e-08	1.87101e-08	1.87101e-08	0.00752963	0.000923203	0.0154972	0.000251541	1.87101e-08	1.87101e-08	0.00133129	0.0421336	1.87101e-08	1.50534e-05
Eastern China_(EC)	Shaoguang_(SG)	SG_F	SG	5.79353e-05	1.68594e-08	0.000508794	0.000267282	0.00100363	0.00254979	0.237077	0.00125932	0.00242439	1.68594e-08	1.68594e-08	1.68594e-08	1.68594e-08	0.000115348	1.68594e-08	0.00270647	1.68594e-08	0.000130821	0.00101741	1.68594e-08	0.000514711	1.68594e-08	0.000756213	0.00190733	1.68594e-08	0.00122615	0.000312586	0.000105958	0.000117574	0.0225136	0.00766136	0.00220123	0.000562135	1.68594e-08	1.68594e-08	1.68594e-08	0.00192217	0.000240804	0.00296582	0.000246487	0.00333051	1.68594e-08	0.00159067	0.0291783	0.00126869	4.25373e-05
Eastern China_(EC)	Shaoguang_(SG)	SG_G	SG	0.000149585	0.000990234	0.000417384	0.000285378	1.65298e-08	0.00179495	0.202693	0.000635515	1.65298e-08	1.65298e-08	1.65298e-08	1.65298e-08	1.65298e-08	0.000307309	1.65298e-08	0.00264389	1.65298e-08	0.00431835	0.00133845	1.65298e-08	0.000835378	0.00130258	0.00101225	1.65298e-08	0.00123575	1.65298e-08	1.65298e-08	0.000188592	1.65298e-08	0.0459099	0.00761563	1.65298e-08	0.000396277	0.00293475	1.65298e-08	1.65298e-08	1.65298e-08	1.65298e-08	1.65298e-08	0.00019529	1.65298e-08	0.000309946	0.00160106	1.65298e-08	0.00163061	1.65298e-08
Eastern China_(EC)	Shaoguang_(SG)	SG_H	SG	2.68468e-08	0.00198245	2.68468e-08	0.00263565	0.00166714	0.00527093	0.3444	0.00159385	0.00475009	2.68468e-08	2.68468e-08	2.68468e-08	2.68468e-08	2.68468e-08	2.68468e-08	0.00463024	2.68468e-08	0.00471512	0.00200831	0.000702803	0.000638375	0.00227894	0.00201766	0.00149843	0.00215906	2.68468e-08	2.68468e-08	0.00054653	2.68468e-08	2.68468e-08	0.00503269	2.68468e-08	0.00076114	0.00319497	0.00105916	2.68468e-08	2.68468e-08	2.68468e-08	0.0274228	0.000332771	2.68468e-08	0.000100489	0.00158204	2.68468e-08	0.00212979	2.68468e-08
Eastern China_(EC)	Shaoguang_(SG)	SG_I	SG	1.69283e-08	1.69283e-08	0.000425349	0.000217702	0.000545028	0.00339961	0.213329	1.69283e-08	0.00214943	1.69283e-08	0.00166236	1.69283e-08	1.69283e-08	4.78065e-05	1.69283e-08	0.00229505	1.69283e-08	0.000156947	0.00116811	1.69283e-08	0.000629091	1.69283e-08	0.000800891	0.00133213	1.69283e-08	0.00124016	0.00030175	0.000144549	1.69283e-08	0.0245919	0.00627215	1.69283e-08	0.000258118	1.69283e-08	0.000394462	1.69283e-08	0.00318311	1.69283e-08	0.00272445	0.000199932	1.69283e-08	1.69283e-08	0.00175353	0.0448067	0.00126444	3.85641e-05
Eastern China_(EC)	Shaoguang_(SG)	SG_J	SG	0.000116991	0.0015571	0.000408468	0.00027427	0.00096391	0.00169399	0.198714	0.00140244	1.62545e-08	1.62545e-08	1.62545e-08	1.62545e-08	1.62545e-08	1.62545e-08	1.62545e-08	0.00215672	1.62545e-08	1.62545e-08	0.00110504	0.000440554	0.00053665	0.00526242	0.000899554	1.62545e-08	0.000904805	0.0117856	0.00080204	0.000161428	0.000191853	0.104664	0.0056477	1.62545e-08	0.000691862	0.00345159	1.62545e-08	1.62545e-08	1.62545e-08	0.00153446	1.62545e-08	0.000179702	1.62545e-08	0.000214531	0.00172867	1.62545e-08	1.62545e-08	1.62545e-08
Western China_(WC)	Hanzhong_(HZ)	HZ_A	HZ	1.71946e-08	1.71946e-08	0.000233936	0.00160542	0.000879274	0.000208112	0.234266	0.000738803	0.00168137	0.000233758	0.000488824	0.000140119	0.000371062	0.000115762	1.71946e-08	0.00353148	0.000332384	0.000109314	1.71946e-08	1.71946e-08	0.000495098	1.71946e-08	1.71946e-08	0.000207399	1.71946e-08	0.000315046	1.71946e-08	7.9377e-05	1.71946e-08	0.0257049	0.00698259	0.000343897	1.71946e-08	1.71946e-08	0.000279444	0.00102651	0.000529831	7.66336e-05	0.000800053	1.71946e-08	0.00208104	4.33897e-05	0.00119625	0.0237949	0.00144722	1.71946e-08
Western China_(WC)	Hanzhong_(HZ)	HZ_B	HZ	1.92995e-08	0.00184645	0.000247042	0.00236505	0.00112524	0.000249084	0.289524	0.000790301	0.00113392	0.000478227	0.00112078	0.000239218	0.000129133	9.10863e-05	0.00020833	0.0041519	1.92995e-08	1.92995e-08	1.92995e-08	1.92995e-08	0.000825771	1.92995e-08	1.92995e-08	8.63692e-05	1.92995e-08	0.000748036	5.69815e-05	0.000167168	0.00031247	1.92995e-08	0.00767583	1.92995e-08	0.000325923	1.92995e-08	0.000408276	0.00115158	0.000192151	9.22735e-05	0.000711149	1.92995e-08	0.000598341	1.92995e-08	0.00105518	0.00283016	0.00110458	1.92995e-08
Western China_(WC)	Hanzhong_(HZ)	HZ_C	HZ	1.98014e-08	1.98014e-08	0.000285231	0.00274537	0.000975	0.000440348	0.278892	0.000916217	0.00113324	0.000525876	0.00124669	0.000281067	0.000104352	0.000147334	1.98014e-08	0.00485532	0.000280764	1.98014e-08	1.98014e-08	1.98014e-08	0.00066634	1.98014e-08	1.98014e-08	1.98014e-08	4.60539e-05	0.000431705	5.2898e-05	1.98014e-08	1.98014e-08	1.98014e-08	1.98014e-08	1.98014e-08	0.000531014	1.98014e-08	0.000226107	0.00134989	5.7656e-05	6.20006e-05	0.000823355	1.98014e-08	0.000284511	1.98014e-08	0.000952302	0.00378794	0.00142101	1.98014e-08
Western China_(WC)	Hanzhong_(HZ)	HZ_D	HZ	1.87647e-08	1.87647e-08	0.000254735	0.00180529	0.000842334	0.000924802	0.272007	0.00113497	0.00242656	0.000252739	0.00060249	0.000111479	1.87647e-08	0.000156434	1.87647e-08	0.00402439	1.87647e-08	0.00077594	1.87647e-08	0.000270951	1.87647e-08	1.87647e-08	1.87647e-08	0.00046804	0.000307032	0.00499185	0.000337949	5.34708e-05	1.87647e-08	0.0346634	0.0061462	1.87647e-08	0.000566465	1.87647e-08	0.000395924	0.000807005	0.000114114	0.000342476	0.00478612	1.87647e-08	0.000203017	1.87647e-08	0.000587499	0.00416567	0.00128633	1.87647e-08
Western China_(WC)	Hanzhong_(HZ)	HZ_E	HZ	1.74557e-08	0.000891865	0.000165573	0.00210169	0.000483558	1.74557e-08	0.256199	0.00123756	0.000488052	0.000287073	0.000515741	0.000130253	0.000146752	1.74557e-08	1.74557e-08	0.00158369	0.000754143	0.000223948	0.00164969	8.29896e-05	1.74557e-08	1.74557e-08	1.74557e-08	8.24925e-05	1.74557e-08	0.000778147	0.000169859	1.74557e-08	1.74557e-08	0.00500501	0.00515716	1.74557e-08	0.000299597	1.74557e-08	0.000456505	0.000683408	9.14976e-05	0.000132888	0.00232867	1.74557e-08	1.74557e-08	1.74557e-08	0.000832886	0.00259542	0.00101079	0.00298556
Western China_(WC)	Hanzhong_(HZ)	HZ_F	HZ	1.81655e-08	0.000376439	0.000221228	0.00175633	0.00105003	0.000598722	0.24204	0.00135366	0.00108515	0.000279637	0.00117733	9.86396e-05	0.000235466	0.000159561	1.81655e-08	0.00389048	0.000375719	0.00123618	1.81655e-08	8.55949e-05	0.000634991	1.81655e-08	1.81655e-08	0.000100871	0.000185718	0.00287564	0.000392074	0.000184066	0.0001066	1.81655e-08	0.00568316	1.81655e-08	0.000332246	1.81655e-08	0.000504022	0.000992973	0.0004042	1.81655e-08	0.00384733	1.81655e-08	0.000859462	1.81655e-08	0.00134673	0.0140639	0.00160436	1.81655e-08
Western China_(WC)	Hanzhong_(HZ)	HZ_G	HZ	1.72013e-08	0.00248943	0.000128729	0.00125521	0.000386977	1.72013e-08	0.259909	0.000814722	0.00043323	0.000256022	0.00052682	1.72013e-08	0.000227911	0.000101436	1.72013e-08	0.00123646	0.000358069	0.000350516	0.00140415	7.655e-05	0.000692963	1.72013e-08	1.72013e-08	0.000264463	0.000243919	0.00285224	0.000198173	1.72013e-08	0.000142103	0.00509597	0.00604632	1.72013e-08	0.000456922	1.72013e-08	0.000272666	0.00159785	0.000174141	0.000211889	0.00246054	0.00134422	0.000852379	1.72013e-08	0.00115862	0.00891617	0.00111885	0.00368176
Western China_(WC)	Hanzhong_(HZ)	HZ_H	HZ	1.85479e-08	0.00124146	0.000326846	0.0029322	0.000828137	0.00215954	0.269248	0.00229007	0.0034046	0.000603457	0.00147393	0.000160633	0.000108706	1.85479e-08	1.85479e-08	0.00402325	0.000289247	0.00033446	1.85479e-08	1.85479e-08	1.85479e-08	1.85479e-08	1.85479e-08	0.000256897	0.000144874	0.00223706	6.42144e-05	1.85479e-08	0.000258652	0.0710542	0.00562739	1.85479e-08	0.000715061	1.85479e-08	0.000391183	0.0010007	0.000113574	0.000176565	0.00237695	1.85479e-08	0.000367711	1.85479e-08	0.000753767	0.00746028	0.00120291	1.85479e-08
Western China_(WC)	Hanzhong_(HZ)	HZ_I	HZ	6.60423e-05	0.00273112	0.000808288	2.11578e-08	0.00133655	2.11578e-08	0.290311	0.00213208	2.11578e-08	2.11578e-08	2.11578e-08	2.11578e-08	0.000175445	2.11578e-08	0.00224731	2.11578e-08	0.000350453	0.00254696	2.11578e-08	0.00012888	2.11578e-08	0.00452162	0.000255136	0.00108074	0.00021671	0.00392031	0.000360425	0.000398275	2.11578e-08	2.11578e-08	0.00703466	0.000496314	0.000449206	0.00161989	0.000388654	0.00146931	0.00220333	0.000458816	0.00438684	2.11578e-08	0.00065625	0.000145746	0.000946088	0.00823703	0.00136445	2.11578e-08
Western China_(WC)	Hanzhong_(HZ)	HZ_J	HZ	2.47529e-08	2.47529e-08	0.000782686	2.47529e-08	0.0014742	0.00159893	0.369967	2.47529e-08	0.00551927	2.47529e-08	2.47529e-08	2.47529e-08	0.00017949	0.000380262	2.47529e-08	0.00607265	0.00055987	2.47529e-08	0.00316898	2.47529e-08	2.47529e-08	2.47529e-08	2.47529e-08	0.000147949	5.66973e-05	0.000300863	8.56346e-05	0.000606102	2.47529e-08	0.0373234	0.00629418	0.000303046	0.000659434	2.47529e-08	0.000607959	0.00166315	0.000231062	5.90578e-05	0.00113862	0.00214459	0.00105985	2.47529e-08	0.000701025	0.0107372	0.00197157	2.47529e-08
Western China_(WC)	Beichuan_(BC)	BC_A	BC	2.06307e-08	2.06307e-08	2.06307e-08	0.000454712	0.000372069	0.000509017	0.314151	0.000475625	0.000577471	0.000138072	0.000390073	2.06307e-08	0.000266493	0.000106922	2.06307e-08	0.000803261	0.000412934	2.06307e-08	0.00119809	2.06307e-08	0.000465675	2.06307e-08	2.06307e-08	0.000895943	2.06307e-08	0.000553404	2.06307e-08	0.000292598	2.06307e-08	0.00377533	0.00652499	2.06307e-08	0.000460878	2.06307e-08	2.06307e-08	0.000956793	0.000448439	5.58602e-05	0.00105507	0.000876472	0.000623498	2.06307e-08	0.00160206	0.00953565	0.0010018	0.00193032
Western China_(WC)	Beichuan_(BC)	BC_B	BC	1.86401e-08	0.00225172	1.86401e-08	0.000512963	0.00111216	1.86401e-08	0.276472	0.000587332	0.00386607	1.86401e-08	0.00049823	1.86401e-08	0.000185533	0.000111599	1.86401e-08	0.0027986	0.000527129	0.000579248	0.0021378	0.000117966	1.86401e-08	1.86401e-08	1.86401e-08	0.00120743	0.000192427	0.00293236	0.000387437	1.86401e-08	1.86401e-08	0.0604595	1.86401e-08	0.000497991	1.86401e-08	1.86401e-08	1.86401e-08	0.00139733	0.000488679	0.000190626	0.00353459	0.00104421	0.00171504	1.86401e-08	0.00116381	0.018435	0.00105631	0.00327209
Western China_(WC)	Beichuan_(BC)	BC_C	BC	1.75157e-08	0.00204193	1.75157e-08	0.000691893	0.000667213	0.000689347	0.280257	0.000768436	0.00149293	0.0001976	0.000441631	1.75157e-08	0.000163441	0.000120333	1.75157e-08	0.00127512	0.000310082	1.75157e-08	0.00100545	1.75157e-08	0.000697081	1.75157e-08	1.75157e-08	0.00028867	1.75157e-08	0.000277834	1.75157e-08	0.000102457	7.58375e-05	0.0323596	0.00688636	0.000148672	0.000306763	1.75157e-08	0.000249801	0.00135454	0.000250648	1.75157e-08	0.000524057	0.000953428	0.0012901	0.000106365	0.00138637	0.00728668	0.000816341	0.00219012
Western China_(WC)	Beichuan_(BC)	BC_D	BC	1.75543e-08	1.75543e-08	1.75543e-08	0.000681262	0.000492665	1.75543e-08	0.26547	0.00101232	0.000379599	1.75543e-08	0.000352019	1.75543e-08	0.000234979	8.2146e-05	1.75543e-08	0.0013747	0.000395549	6.13165e-05	0.00119983	1.75543e-08	0.000744477	1.75543e-08	1.75543e-08	0.000370113	1.75543e-08	0.000403522	1.75543e-08	0.000116549	8.46065e-05	1.75543e-08	0.00621694	0.000300214	0.000551405	1.75543e-08	0.000200015	0.000824409	0.00053497	1.75543e-08	0.000801623	0.000913737	0.00107391	1.75543e-08	0.00167523	0.0132982	0.00109529	0.00224985
Western China_(WC)	Beichuan_(BC)	BC_E	BC	1.70187e-08	0.00296069	1.70187e-08	0.000584114	0.000753132	0.00262355	0.257326	0.000712645	1.70187e-08	0.000166725	0.000256263	1.70187e-08	0.000201086	8.75518e-05	1.70187e-08	0.00190983	0.000347914	0.000229009	0.00130776	1.70187e-08	1.70187e-08	1.70187e-08	1.70187e-08	0.0007689	0.000194036	0.00220225	0.00014772	1.70187e-08	0.00012762	1.70187e-08	0.00699397	0.000487641	0.000574131	1.70187e-08	0.000263465	0.00121382	0.00031714	0.000272473	0.00331698	0.000892769	0.00176379	0.000215949	0.00117275	0.0143064	0.0010674	0.00233406
Western China_(WC)	Beichuan_(BC)	BC_F	BC	1.742e-08	1.742e-08	1.742e-08	0.000789723	0.000373048	0.000902155	0.278735	0.00135267	0.00103575	0.000452447	0.00126846	4.95197e-05	0.000240153	6.61721e-05	1.742e-08	0.000239619	0.000147797	1.742e-08	0.000980442	1.742e-08	0.000537977	1.742e-08	1.742e-08	0.00070621	1.742e-08	0.000696401	6.65969e-05	1.742e-08	9.9257e-05	0.0206493	0.00669909	1.742e-08	0.000312064	1.742e-08	0.000198597	0.00106841	0.000195073	7.6163e-05	0.00173765	0.000569142	0.000411381	1.742e-08	0.0018742	0.00291338	0.00145803	0.0014766
Western China_(WC)	Beichuan_(BC)	BC_G	BC	1.7391e-08	0.00217355	8.74111e-05	0.00104698	0.000951498	0.00168804	0.279715	0.00053631	0.000721959	1.7391e-08	0.000464976	1.7391e-08	0.000265033	0.00012634	1.7391e-08	0.00229449	0.000554142	1.7391e-08	0.00154328	1.7391e-08	0.000536975	1.7391e-08	1.7391e-08	0.000860867	1.7391e-08	0.000431929	1.7391e-08	0.000173747	0.000126894	1.7391e-08	0.01008	0.000546408	0.00039109	1.7391e-08	0.000327534	0.00100968	0.000408737	1.7391e-08	0.000935991	0.000902243	0.00118542	1.7391e-08	0.00152364	0.0179186	0.000924546	0.00253098
Western China_(WC)	Beichuan_(BC)	BC_H	BC	1.80244e-08	0.00134685	1.25028e-05	0.000680235	0.00067454	0.00091602	0.278875	0.000777906	0.0011534	0.000136414	0.000524522	7.08977e-06	0.000222388	0.000100152	1.80244e-08	0.00152794	0.000385078	0.000124235	0.00133895	1.68677e-05	0.000426032	1.80244e-08	1.80244e-08	0.000728304	5.52219e-05	0.0010711	8.59752e-05	9.79147e-05	7.34649e-05	0.0167491	0.00620019	0.000282995	0.000370907	1.80244e-08	0.000177064	0.00111785	0.000377669	8.5025e-05	0.00170085	0.000878858	0.00115188	4.60579e-05	0.00148544	0.0119563	0.00105996	0.00228343
Western China_(WC)	Beichuan_(BC)	BC_I	BC	1.74046e-08	0.00184859	1.74046e-08	0.000319187	0.000637411	0.0032698	0.283719	0.00057429	0.00336515	0.000114195	0.000367501	1.74046e-08	0.000218472	0.000207519	1.74046e-08	0.000550118	0.000959375	0.000798307	0.00123373	0.000264935	0.000462405	1.74046e-08	1.74046e-08	0.0028913	0.000207377	0.00450102	0.000997868	0.000231151	1.74046e-08	0.0645188	0.00990986	0.000954356	0.000636209	1.74046e-08	0.000117075	0.000904928	0.000661142	0.000364868	0.00721948	0.00062432	0.00159156	1.74046e-08	0.00133742	0.0352636	0.00139565	0.0017248
Western China_(WC)	Beichuan_(BC)	BC_J	BC	1.78558e-08	1.78558e-08	1.78558e-08	0.000404119	0.000557088	0.00177124	0.268343	0.00109482	0.00126361	0.000197034	0.000648057	1.78558e-08	0.000232578	0.000129794	1.78558e-08	0.0013407	0.00069938	0.000229142	0.00105667	1.78558e-08	0.000417699	1.78558e-08	1.78558e-08	0.00135747	1.78558e-08	0.00148911	0.00018959	0.000131475	5.38313e-05	0.0254924	0.00278959	1.78558e-08	0.000293203	0.000247977	0.000132473	0.000789202	0.000675239	1.78558e-08	0.00257698	0.000518762	0.00191551	1.78558e-08	0.00148636	0.0218473	0.00124581	0.00169945
Western China_(WC)	Jiangkou_(JK)	JK_A	JK	1.71421e-08	1.71421e-08	9.55581e-05	0.00100295	0.000469391	0.000320499	0.229127	0.000236369	0.000658056	1.71421e-08	0.000300205	7.00958e-05	0.000120301	1.71421e-08	1.71421e-08	0.000883104	0.000188881	1.71421e-08	0.000916199	1.71421e-08	0.000250319	1.71421e-08	1.71421e-08	1.71421e-08	0.00011007	0.00106717	0.000100077	1.71421e-08	0.000149922	0.0127916	0.00702774	1.71421e-08	0.000508399	1.71421e-08	1.71421e-08	0.000819431	0.000117895	0.000130709	0.00138799	0.00145223	9.28213e-05	1.71421e-08	0.000570459	0.00149246	0.00129094	0.00148951
Western China_(WC)	Jiangkou_(JK)	JK_B	JK	1.72735e-08	1.72735e-08	0.000156319	0.00153244	0.000477178	0.000405718	0.232938	0.000595802	0.000453296	0.00027931	0.000592781	8.28307e-05	0.000166213	1.72735e-08	1.72735e-08	0.00125475	0.000117454	0.000328008	0.000933731	0.000122667	0.000418014	1.72735e-08	1.72735e-08	5.97688e-05	0.000217011	0.00179529	0.000130024	5.87325e-05	0.000124251	0.00898126	0.00734861	1.72735e-08	0.000546686	1.72735e-08	0.00032808	0.000589362	0.000202407	0.000145959	0.00124731	0.00157173	1.72735e-08	1.72735e-08	0.000735287	0.00152463	0.00110916	0.0015876
Western China_(WC)	Jiangkou_(JK)	JK_C	JK	6.24646e-05	0.00113851	1.71307e-08	0.000180456	0.000152379	0.00150395	0.223967	0.00142981	0.00196335	0.000161502	0.000577925	7.63805e-05	0.00018017	1.71307e-08	1.71307e-08	1.71307e-08	0.000233002	0.00324189	0.00190217	0.000108882	1.71307e-08	1.71307e-08	1.71307e-08	0.000787347	0.00028634	0.00355008	0.000919701	1.71307e-08	1.71307e-08	1.71307e-08	0.00813498	1.71307e-08	0.000397287	0.000317963	0.000315293	1.71307e-08	0.000338641	0.000506402	0.0059384	0.00028089	0.000161055	1.71307e-08	0.00075397	0.00238727	0.00122432	0.000475185
Western China_(WC)	Jiangkou_(JK)	JK_D	JK	1.65591e-08	1.65591e-08	0.000194451	0.00207677	0.00062614	0.000900832	0.226024	0.000931383	0.00216651	0.000570589	0.000859433	0.000179628	0.000170164	1.65591e-08	0.000126846	0.0018633	0.000259255	1.65591e-08	0.00145869	1.65591e-08	0.000540347	1.65591e-08	1.65591e-08	0.000111349	4.18348e-06	0.000668167	0.00013854	0.000179331	7.09917e-05	0.0413239	0.00624444	1.65591e-08	0.000376467	1.65591e-08	0.000334321	1.65591e-08	0.000207359	9.50101e-05	0.00131047	0.00159279	0.000150164	1.65591e-08	0.00118102	0.00113134	0.00109886	0.00285266
Western China_(WC)	Jiangkou_(JK)	JK_E	JK	1.62537e-08	1.62537e-08	7.65346e-05	0.00070656	0.000178925	0.000265147	0.224657	0.00129901	0.000129298	0.000136921	0.000487601	1.62537e-08	0.000100427	1.62537e-08	1.62537e-08	0.000444231	0.000121938	0.00030515	0.000770602	1.62537e-08	0.000188332	1.62537e-08	1.62537e-08	8.25183e-05	0.000122144	0.00101011	8.05552e-05	1.62537e-08	1.62537e-08	1.62537e-08	0.00780833	1.62537e-08	1.62537e-08	1.62537e-08	0.000444296	0.00105787	0.00184949	0.00021648	0.00180203	0.000498809	0.000166701	1.62537e-08	0.000506815	0.00555339	0.00113087	0.000720345
Western China_(WC)	Jiangkou_(JK)	JK_F	JK	6.60001e-05	0.000238813	1.69335e-08	0.000926048	0.000283584	0.000269796	0.232488	0.000639032	1.69335e-08	0.000309872	0.000708518	0.000147423	0.000112744	1.69335e-08	1.69335e-08	0.000666899	0.000234127	1.69335e-08	0.000765841	1.69335e-08	1.69335e-08	1.69335e-08	1.69335e-08	1.69335e-08	2.83258e-05	0.000439721	7.24631e-05	1.69335e-08	0.000127388	1.69335e-08	0.00568883	1.69335e-08	0.000659411	1.69335e-08	0.000409612	0.00198647	0.000823673	2.35765e-05	0.000788875	0.000886452	1.69335e-08	1.69335e-08	0.000602741	0.00323873	0.00154922	0.00133581
Western China_(WC)	Jiangkou_(JK)	JK_G	JK	1.69287e-08	1.69287e-08	1.69287e-08	0.000683492	0.00050821	1.69287e-08	0.235796	0.000235927	0.000307827	0.000113776	0.00027875	1.69287e-08	0.000129626	1.69287e-08	1.69287e-08	0.00126881	0.000163933	1.69287e-08	0.00091726	1.69287e-08	1.69287e-08	1.69287e-08	1.69287e-08	1.69287e-08	5.48832e-05	0.000650613	6.02054e-05	1.69287e-08	1.69287e-08	1.69287e-08	0.00640374	1.69287e-08	0.000343359	1.69287e-08	1.69287e-08	0.000770609	0.00014328	4.95972e-05	0.000755041	0.00100284	1.69287e-08	1.69287e-08	0.000563086	0.00254003	0.0012151	0.00145413
Western China_(WC)	Jiangkou_(JK)	JK_H	JK	9.96288e-05	0.00096326	0.00013504	0.00140594	0.000846104	0.00165946	0.236907	1.72331e-08	0.00113326	0.000287816	0.00098157	9.49786e-05	0.000191354	1.72331e-08	1.72331e-08	0.00261604	0.000198243	0.000208282	0.00201137	9.90658e-05	1.72331e-08	1.72331e-08	1.72331e-08	0.000406664	0.000110511	0.00151858	0.000138977	6.44249e-05	0.000157014	0.011808	0.00636558	5.12116e-05	0.000311067	1.72331e-08	0.000572401	1.72331e-08	0.000386692	0.000216272	0.00238044	1.72331e-08	0.000520414	1.72331e-08	0.000581568	0.00569706	0.0011587	0.0040932
Western China_(WC)	Jiangkou_(JK)	JK_I	JK	6.74559e-05	1.85615e-08	0.000182781	0.00148739	0.000983674	0.000970785	0.25575	0.00195218	0.0013671	0.000232958	0.000716734	8.07605e-05	0.000160478	1.85615e-08	1.85615e-08	0.00277564	0.000149344	0.00034424	0.00170402	1.85615e-08	0.000167686	1.85615e-08	1.85615e-08	0.00024927	0.000213015	0.0024929	0.000136121	1.85615e-08	0.000182866	0.0265865	0.00764971	1.85615e-08	1.85615e-08	1.85615e-08	0.000344371	0.00158475	0.000507069	0.00014808	0.0019502	0.00186291	0.000475987	1.85615e-08	0.000686307	0.00267151	0.00118555	0.00342012
Western China_(WC)	Jiangkou_(JK)	JK_J	JK	6.32307e-05	1.68301e-08	0.000372166	1.68301e-08	0.000560904	0.000566148	0.238039	1.68301e-08	0.000455423	1.68301e-08	1.68301e-08	1.68301e-08	7.10107e-05	1.68301e-08	1.68301e-08	0.00144091	1.68301e-08	0.000573445	0.00131689	0.000216501	1.68301e-08	1.68301e-08	1.68301e-08	8.60065e-05	0.000604157	0.00506321	0.000246655	1.68301e-08	0.000240045	0.00485988	0.00642814	1.68301e-08	1.68301e-08	8.2592e-05	0.00045332	0.00145321	0.000343276	0.000936187	0.00693658	0.00138635	1.68301e-08	1.68301e-08	0.000661766	0.00191349	0.00106113	0.0020699
Western China_(WC)	Anlong_(AL)	AL_A	AL	0.000107869	1.71421e-08	0.000185943	0.00198286	0.000372222	0.000324218	0.235481	0.00140569	0.000314307	0.000158428	0.000509884	1.71421e-08	0.00024181	1.71421e-08	1.71421e-08	0.000894998	0.0002982	0.00159273	0.00081495	0.000232989	0.000573786	0.00175338	1.71421e-08	0.0010286	0.000394608	0.00532047	0.000353574	5.12451e-05	6.03796e-05	1.71421e-08	0.00723839	0.00154706	0.000482937	0.000533634	1.71421e-08	1.71421e-08	0.00477173	0.00101366	0.00635743	0.000260238	0.0017899	0.000204578	0.000792128	0.0166073	0.00141596	0.000785418
Western China_(WC)	Anlong_(AL)	AL_B	AL	1.7277e-08	1.7277e-08	0.000146951	0.00158293	0.00022009	0.000510074	0.234232	1.7277e-08	0.00231003	0.000364061	0.000794863	0.00011183	0.000159083	1.7277e-08	0.00417825	0.000868179	0.000324931	0.000695377	0.00101029	1.7277e-08	0.000569109	0.00491465	0.000133718	0.00190647	0.000246628	0.00232583	0.000223192	1.7277e-08	5.27912e-05	0.0511906	0.00773083	0.00112916	0.000447249	1.7277e-08	1.7277e-08	1.7277e-08	0.00703193	0.000852706	0.00344989	0.000180329	0.00221485	0.000127123	0.000907108	0.0317593	0.00130451	0.000520709
Western China_(WC)	Anlong_(AL)	AL_C	AL	0.000177145	1.85345e-08	1.85345e-08	0.00053238	0.000123721	0.000186406	0.24957	0.00115511	0.000167319	0.000126413	0.000453901	1.85345e-08	0.000139931	1.85345e-08	1.85345e-08	0.0007293	0.000279513	0.000392506	0.000617854	1.85345e-08	1.85345e-08	1.85345e-08	1.85345e-08	0.000692516	0.000101826	0.00100902	5.61547e-05	1.85345e-08	3.38461e-05	0.000548375	0.00854379	0.000245267	0.00029061	1.85345e-08	1.85345e-08	0.000175436	0.00212697	0.000153959	0.00106531	0.000289991	0.00170353	6.70005e-05	0.00097616	0.0242003	0.00117293	0.000861762
Western China_(WC)	Anlong_(AL)	AL_D	AL	0.000143333	0.000726541	0.000119764	0.00143982	0.000212531	0.00112646	0.227766	0.000517881	0.00233761	0.000481787	0.0010985	0.000163473	0.000154168	1.73362e-08	0.000516022	0.0011512	0.000271257	0.00282069	0.00103971	0.000278282	1.73362e-08	0.000836516	1.73362e-08	0.00183554	0.000917789	0.0107368	0.000532114	6.66625e-05	0.000167442	0.0453579	0.00883655	0.000319243	0.000425782	0.000243905	1.73362e-08	0.00014194	0.00234719	0.00120935	0.0121387	0.000218065	0.000866815	1.73362e-08	0.00102549	0.00877592	0.00132284	0.000616111
Western China_(WC)	Anlong_(AL)	AL_E	AL	8.48267e-05	0.000159235	1.79077e-08	0.000757595	0.000210869	0.000843382	0.235045	0.000182257	0.000322529	1.79077e-08	0.000424128	1.79077e-08	0.00019852	1.79077e-08	1.79077e-08	0.00103752	0.000189019	1.79077e-08	0.000787415	1.79077e-08	1.79077e-08	1.79077e-08	1.79077e-08	9.35638e-05	1.79077e-08	0.00043921	6.40824e-05	4.74749e-05	1.79077e-08	0.00215797	0.00685068	1.79077e-08	0.000425426	1.79077e-08	0.000329978	0.000219033	0.000734766	1.79077e-08	0.0019062	0.000240542	0.000339485	0.000165425	0.00104999	0.00400079	0.00134184	0.000434254
Western China_(WC)	Anlong_(AL)	AL_F	AL	0.000101056	1.69926e-08	8.72522e-05	0.000945548	9.00554e-05	0.000395583	0.236735	0.00246363	0.000143948	0.000223244	0.000921446	9.7793e-05	0.000137663	1.69926e-08	1.69926e-08	0.000105789	0.000245565	0.000242393	0.000718033	1.69926e-08	0.000403921	1.69926e-08	1.69926e-08	1.69926e-08	8.5952e-05	0.000553785	7.553e-05	0.000221806	0.000128752	0.000450983	0.00766781	0.000108784	1.69926e-08	0.000165323	1.69926e-08	1.69926e-08	0.000262134	0.000171956	0.00130743	5.68348e-05	2.01527e-05	1.69926e-08	0.000859079	0.000380686	0.00138016	1.69926e-08
Western China_(WC)	Anlong_(AL)	AL_G	AL	0.000120974	1.67972e-08	1.67972e-08	0.000629545	0.000142436	1.67972e-08	0.238861	0.000446277	0.000178835	0.000254985	0.000651031	1.67972e-08	0.000140387	1.67972e-08	0.00462177	0.000438731	0.000281634	0.00416273	0.000927163	0.000120825	1.67972e-08	0.00762666	1.67972e-08	0.00102258	0.000266264	0.002919	0.000208629	1.67972e-08	7.30149e-05	1.67972e-08	0.00675437	8.52691e-05	0.000491955	1.67972e-08	0.000522993	1.67972e-08	0.00442664	0.000638899	0.00448548	0.000143708	0.000257182	2.8818e-05	0.000804551	0.00787249	0.0012384	0.000553354
Western China_(WC)	Anlong_(AL)	AL_H	AL	0.000130373	1.70184e-08	1.70184e-08	0.00136915	0.00022062	0.00060685	0.22481	0.000766296	0.000531404	1.70184e-08	0.00121594	0.000177974	8.02533e-05	1.70184e-08	1.70184e-08	0.000684482	0.000178748	0.00294337	0.000815367	7.74544e-05	0.000284167	0.00304037	1.70184e-08	0.000884928	0.00063769	0.00511577	0.000157234	1.70184e-08	0.000130778	0.00985986	0.00881744	8.37633e-05	0.000489418	0.00157928	1.70184e-08	1.70184e-08	1.70184e-08	0.000735903	0.00483149	0.000172749	0.00033415	1.70184e-08	0.000933727	0.00686302	1.70184e-08	0.000601333
Western China_(WC)	Anlong_(AL)	AL_I	AL	0.000122285	1.73586e-08	4.58501e-05	0.000601777	1.73586e-08	0.000572214	0.243036	0.00121967	0.000687829	1.73586e-08	0.000542374	7.15943e-05	1.73586e-08	1.73586e-08	0.000580718	0.000627842	0.000285339	0.00237797	0.000874086	7.69267e-05	1.73586e-08	0.00083281	1.73586e-08	0.000851009	0.000207299	0.00233164	6.60713e-05	1.73586e-08	1.73586e-08	0.0196743	0.00912903	1.73586e-08	0.000457218	1.73586e-08	1.73586e-08	1.73586e-08	0.0017371	0.000456275	0.00373371	0.000177665	0.000118221	1.73586e-08	0.000820162	0.00525384	0.00127025	0.000162813
Western China_(WC)	Anlong_(AL)	AL_J	AL	0.00017649	1.71782e-08	1.71782e-08	0.000456674	0.000117783	0.000135101	0.239529	0.000222917	0.000381109	0.000141002	0.000293053	4.97726e-05	0.000154884	1.71782e-08	0.000935033	0.000592851	0.000324894	0.000516687	0.00102046	1.71782e-08	1.71782e-08	0.00069157	1.71782e-08	0.000191407	0.000297905	0.00204319	1.71782e-08	1.71782e-08	4.87322e-05	0.00704774	0.00750292	1.71782e-08	0.000443947	1.71782e-08	1.71782e-08	1.71782e-08	0.00543985	0.00121115	0.00193823	0.000195241	0.000135518	1.71782e-08	0.000978584	0.00166127	0.00131127	0.000400466
Southern Yunnan_(SY)	Hekou_(HK)	HK_A	HK	0.000126594	1.53336e-08	1.53336e-08	0.000247098	0.000146094	0.000515224	0.214638	0.00109998	0.000185159	0.000177224	0.000552088	1.53336e-08	0.000218695	1.53336e-08	0.0056439	0.000376763	0.000219146	1.53336e-08	0.00144619	1.53336e-08	1.53336e-08	0.00725451	1.53336e-08	0.00208416	1.53336e-08	1.53336e-08	0.000527761	1.53336e-08	8.51755e-05	1.53336e-08	0.00737069	6.8742e-05	0.000484753	0.00186426	0.000637363	0.000183369	0.00653715	1.53336e-08	1.53336e-08	0.000247846	0.000812856	1.53336e-08	0.000566899	0.0060247	0.0011493	0.000843275
Southern Yunnan_(SY)	Hekou_(HK)	HK_B	HK	1.57058e-08	0.00126989	1.57058e-08	0.000248571	0.000308972	0.000624809	0.222316	0.000582492	0.000266858	0.000282352	0.000649274	1.57058e-08	0.000168247	0.000116783	0.0043783	0.000298081	0.000180739	0.00227927	0.000923301	0.000151514	1.57058e-08	0.00891653	1.57058e-08	0.00110768	0.000915614	0.00590994	0.000302654	1.57058e-08	9.78038e-05	0.00357663	0.00740952	0.00065298	0.000468133	0.00287086	1.57058e-08	1.57058e-08	1.57058e-08	0.0016455	0.00805034	0.000253762	0.000836717	1.57058e-08	0.00108339	0.0273062	0.00113916	0.000776034
Southern Yunnan_(SY)	Hekou_(HK)	HK_C	HK	2.25737e-08	0.000958193	0.000100758	0.00138106	0.000402571	0.00247534	0.346405	0.0022483	0.00165018	0.000638503	0.00161465	0.000199605	2.25737e-08	2.25737e-08	2.25737e-08	0.000968132	0.000337954	0.00045527	0.00197847	2.25737e-08	2.25737e-08	2.25737e-08	0.00281935	0.000528291	0.000151236	2.25737e-08	2.25737e-08	2.25737e-08	0.000258323	0.0295741	0.00820505	0.000260694	2.25737e-08	2.25737e-08	0.000430986	0.000467286	0.0133891	0.000645506	0.0012853	0.000629626	0.000687187	2.25737e-08	0.000616497	0.00403359	0.00172318	0.00149544
Southern Yunnan_(SY)	Hekou_(HK)	HK_D	HK	1.82739e-08	0.00117643	1.82739e-08	0.000960061	0.000294061	0.00161046	0.267857	0.00293912	0.00229788	0.000523562	0.00145941	0.000125893	0.00039584	1.82739e-08	0.00912959	0.000873904	0.000317653	0.00234369	0.00140393	7.7801e-05	1.82739e-08	0.00898521	1.82739e-08	0.00160674	0.000363135	0.00514242	0.000288442	6.01985e-05	0.000231988	0.0539941	0.00629917	0.0010604	0.000514759	0.00165021	0.000657176	1.82739e-08	1.82739e-08	0.00041173	0.00559815	0.000506979	0.00224504	8.00554e-05	0.000560169	0.0063717	0.00163973	0.00156692
Southern Yunnan_(SY)	Hekou_(HK)	HK_E	HK	1.8016e-08	0.000780804	1.8016e-08	0.000694808	0.000117627	0.00247455	0.264427	0.000505895	0.00152772	1.8016e-08	0.000869002	0.000112875	0.000131108	1.8016e-08	1.8016e-08	0.000316941	0.000173811	0.00102588	0.000974944	8.03751e-05	0.000729674	1.8016e-08	0.000336624	0.00105804	0.000218416	0.00354396	0.000326005	1.8016e-08	0.000121449	0.0530663	0.00524251	5.4695e-05	0.000284134	1.8016e-08	0.000290765	1.8016e-08	0.00228378	0.000568735	0.00573468	0.000284105	0.00062907	1.8016e-08	0.00074221	0.00624089	0.00125064	0.00062104
Southern Yunnan_(SY)	Hekou_(HK)	HK_F	HK	6.52317e-05	0.00155925	1.79843e-08	0.000405098	0.000137796	0.000292124	0.268425	0.00107432	0.000337977	0.000200115	0.000545881	6.19103e-05	0.000104788	1.79843e-08	1.79843e-08	0.000219108	0.000251445	1.79843e-08	0.000784321	1.79843e-08	1.79843e-08	1.79843e-08	1.79843e-08	0.000178744	1.79843e-08	0.000425388	1.86574e-05	1.79843e-08	8.47582e-05	0.00428392	0.0050838	1.79843e-08	0.000311458	1.79843e-08	0.000381977	1.79843e-08	0.000405627	1.79843e-08	0.00027702	0.000226193	0.000335429	1.79843e-08	0.00109854	0.00373115	0.00111657	0.000465964
Southern Yunnan_(SY)	Hekou_(HK)	HK_G	HK	1.66794e-08	1.66794e-08	1.66794e-08	0.000187604	7.49015e-05	1.66794e-08	0.221914	0.00054982	0.000824725	0.000259747	0.00073362	0.000111476	0.00012964	1.66794e-08	1.66794e-08	0.000285538	1.66794e-08	0.00474848	0.000696476	1.66794e-08	0.000213233	1.66794e-08	1.66794e-08	0.000378264	0.00185282	1.66794e-08	0.000615043	1.66794e-08	0.000124391	1.66794e-08	0.00710452	1.66794e-08	0.000772579	1.66794e-08	0.00019246	1.66794e-08	0.00210361	0.0016513	1.66794e-08	0.000281739	0.000350993	1.66794e-08	0.000600632	0.00522824	0.00113091	0.000591525
Southern Yunnan_(SY)	Hekou_(HK)	HK_H	HK	8.76988e-05	1.56698e-08	1.56698e-08	0.000249659	9.46823e-05	0.000846275	0.226348	1.56698e-08	0.000190029	0.000354038	0.000637352	1.56698e-08	0.000189301	1.56698e-08	1.56698e-08	0.000307285	0.000165978	1.56698e-08	0.000837933	0.000179618	1.56698e-08	0.00567846	1.56698e-08	1.56698e-08	0.000988006	0.00804077	0.000500751	1.56698e-08	0.000136166	1.56698e-08	0.00728872	1.56698e-08	0.000319288	0.00176882	0.000392337	1.56698e-08	0.00615383	0.00178293	0.014018	0.00024541	0.000365467	1.56698e-08	0.000568985	0.00585846	0.00140788	0.000747229
Southern Yunnan_(SY)	Hekou_(HK)	HK_I	HK	1.54308e-08	0.000228892	1.54308e-08	0.000524201	0.000193116	1.54308e-08	0.210869	1.54308e-08	0.000833988	0.000517612	0.00145724	0.000156136	1.54308e-08	1.54308e-08	0.00669502	0.000537899	0.000321916	1.54308e-08	0.00210704	1.54308e-08	1.54308e-08	0.00739614	1.54308e-08	0.00149346	1.54308e-08	1.54308e-08	1.54308e-08	5.9167e-05	0.000151888	0.0181213	0.0084908	0.00214616	0.000435097	0.00391343	1.54308e-08	1.54308e-08	1.54308e-08	1.54308e-08	1.54308e-08	0.000252734	1.54308e-08	8.3042e-05	0.000821968	0.034264	1.54308e-08	0.00119034
Southern Yunnan_(SY)	Hekou_(HK)	HK_J	HK	0.00012562	0.000637694	1.62764e-08	0.000309164	0.000105257	0.00120477	0.220796	0.00304375	0.00021272	0.000319824	0.00148218	0.000120735	0.000182305	1.62764e-08	1.62764e-08	0.000317763	0.000163524	0.00345442	0.00120342	0.000238897	0.00018754	0.00175021	1.62764e-08	0.000420896	0.00143716	0.0112944	0.000548869	6.60349e-05	3.25816e-05	1.62764e-08	0.00659446	1.62764e-08	1.62764e-08	0.000843449	0.000371702	1.62764e-08	0.0147915	0.00216877	0.0120458	0.000234662	0.000664583	1.62764e-08	0.000562239	0.0147359	0.00124162	0.000664589
Southern Yunnan_(SY)	Simao_(SM)	SM_A	SM	1.66212e-08	1.66212e-08	1.66212e-08	0.000438512	0.000145307	0.000319519	0.222041	0.00129849	0.000360618	0.000356691	0.000858774	0.00015627	0.000219873	1.66212e-08	0.0036789	0.000405029	0.000186616	0.00370544	1.66212e-08	0.000168059	0.000662624	0.00382419	1.66212e-08	0.000703666	0.00160514	0.0108718	0.000112699	0.000109069	0.000137965	0.00443815	0.00832068	0.00013672	1.66212e-08	1.66212e-08	0.000426369	1.66212e-08	0.0129556	0.00214979	0.00927125	0.000397768	0.00100863	0.00013325	0.00103158	0.00970853	0.00130227	0.00123008
Southern Yunnan_(SY)	Simao_(SM)	SM_B	SM	0.000104262	1.62939e-08	1.62939e-08	0.000437689	0.000343293	0.000199801	0.198903	0.00139441	0.000462668	0.000591169	0.00135813	0.000179962	0.000245568	1.62939e-08	1.62939e-08	0.000635492	0.000231955	1.62939e-08	0.00179506	1.62939e-08	0.000584895	0.00976773	1.62939e-08	1.62939e-08	1.62939e-08	1.62939e-08	1.62939e-08	0.000213904	0.000209066	0.00264966	0.00992629	0.000670467	0.000503207	1.62939e-08	1.62939e-08	1.62939e-08	1.62939e-08	1.62939e-08	1.62939e-08	0.000423146	0.0018648	0.000250011	0.000700085	0.0297371	0.00154124	0.00141263
Southern Yunnan_(SY)	Simao_(SM)	SM_C	SM	9.34017e-05	0.00142579	1.67533e-08	0.00044742	0.000227796	0.001416	0.208338	0.000577189	0.000758899	0.000277239	0.000682745	1.67533e-08	0.000204177	1.67533e-08	0.000785809	0.000659053	0.000291258	0.00245191	0.00119873	1.67533e-08	1.67533e-08	0.00122666	1.67533e-08	0.00190263	0.00192867	1.67533e-08	0.000576739	0.000140356	6.58786e-05	0.0139773	0.0082351	0.000341294	0.000409266	1.67533e-08	1.67533e-08	1.67533e-08	0.00534701	1.67533e-08	1.67533e-08	0.000436742	0.00183433	0.000180777	0.000991954	0.0417921	0.00117979	0.00161542
Southern Yunnan_(SY)	Simao_(SM)	SM_D	SM	5.75456e-05	0.000502204	1.70358e-08	0.000299994	0.000232194	0.000593643	0.21845	0.000977522	0.00205168	0.000237393	0.000734683	9.86375e-05	0.000136675	1.70358e-08	0.000920223	0.000413046	0.000185383	0.00101294	0.000897437	9.68708e-05	1.70358e-08	0.00156514	1.70358e-08	0.00100426	0.0010988	0.00938012	0.000282803	8.91535e-05	0.000171885	0.0458625	0.00809422	1.70358e-08	1.70358e-08	1.70358e-08	1.70358e-08	1.70358e-08	0.00721829	0.00142512	0.00466585	0.000414769	0.00102755	1.70358e-08	0.000679314	0.015631	0.00122599	0.000711085
Southern Yunnan_(SY)	Simao_(SM)	SM_E	SM	7.45518e-05	0.000572904	1.70452e-08	0.0003771	0.0001793	0.000569188	0.224384	0.000504137	0.000481595	0.000220975	0.000462977	1.70452e-08	0.000235929	1.70452e-08	0.00270053	0.000540327	0.0001996	0.00128239	0.00117959	7.81714e-05	0.000639769	0.00420797	1.70452e-08	0.00159423	0.000437974	0.00384819	0.000109104	0.000124142	9.98762e-05	0.00766601	0.00848151	1.70452e-08	0.000372535	1.70452e-08	1.70452e-08	0.000253781	0.00861	0.000648157	0.00474811	0.000585566	0.000488865	1.70452e-08	0.000734349	0.00834007	0.00134702	0.00159379
Southern Yunnan_(SY)	Simao_(SM)	SM_F	SM	7.14413e-05	0.00128952	1.67233e-08	0.000704553	0.000139747	0.000816468	0.196199	0.00233049	0.00446468	0.000896408	0.00160989	0.000235917	0.000282757	1.67233e-08	1.67233e-08	0.000549056	0.000217965	1.67233e-08	0.00158243	1.67233e-08	0.000710762	0.0105978	1.67233e-08	0.000897607	1.67233e-08	1.67233e-08	1.67233e-08	1.67233e-08	0.00021991	1.67233e-08	0.0098743	0.000295513	1.67233e-08	1.67233e-08	1.67233e-08	1.67233e-08	1.67233e-08	1.67233e-08	1.67233e-08	0.000480914	0.00162292	1.67233e-08	0.000936018	0.00768342	1.67233e-08	0.00137731
Southern Yunnan_(SY)	Simao_(SM)	SM_G	SM	0.000141221	1.59656e-08	1.59656e-08	0.000305039	0.000111012	0.000153451	0.207644	0.00123337	0.000119363	0.000606964	0.00105481	0.000209947	0.000171976	1.59656e-08	1.59656e-08	0.000371196	0.000230334	0.00123827	0.000970707	7.47581e-05	1.59656e-08	0.00993364	1.59656e-08	0.000613976	0.000556068	0.00394668	0.000151575	0.000130247	0.000102621	1.59656e-08	0.00824579	1.59656e-08	0.000352717	1.59656e-08	1.59656e-08	1.59656e-08	1.59656e-08	9.80072e-05	0.00456104	0.000278377	0.000516234	5.04492e-05	0.000908418	0.0181446	0.00122282	1.59656e-08
Southern Yunnan_(SY)	Simao_(SM)	SM_H	SM	0.000165439	0.000326308	1.61957e-08	0.000296323	9.9836e-05	1.61957e-08	0.194547	0.001295	0.000102291	0.00050609	0.00103616	0.000181291	0.000179568	1.61957e-08	1.61957e-08	1.61957e-08	0.000158491	0.00354936	0.000974046	0.000141593	0.000339987	1.61957e-08	1.61957e-08	0.00149108	1.61957e-08	0.0136591	0.00049964	0.000134972	0.000116234	1.61957e-08	1.61957e-08	0.000537384	0.000385148	1.61957e-08	1.61957e-08	1.61957e-08	1.61957e-08	1.61957e-08	0.0184706	0.000222246	0.00155573	0.000114648	0.00105117	0.0169966	0.00114411	0.000492104
Southern Yunnan_(SY)	Simao_(SM)	SM_I	SM	0.000130163	0.000650461	1.69057e-08	0.000325523	0.000147048	0.000294837	0.223862	0.000590175	0.000146088	0.000241236	0.000715663	0.000121706	0.00021241	1.69057e-08	0.000375858	0.000599131	0.000151247	0.000206425	0.000836286	1.69057e-08	1.69057e-08	0.00112012	1.69057e-08	0.000598185	9.41264e-05	0.000748382	3.87431e-05	8.7451e-05	0.000120351	1.69057e-08	0.00841425	0.000115378	0.000410686	0.000360606	1.69057e-08	0.000246142	0.00283957	1.69057e-08	0.00132611	0.000459546	0.00101675	1.69057e-08	0.000610411	0.0139713	0.00126094	0.00182935
Southern Yunnan_(SY)	Simao_(SM)	SM_J	SM	0.00010758	0.000875722	1.63956e-08	0.000451887	0.000184686	0.00074827	0.207954	0.00307864	0.000254994	0.000499498	0.00141615	0.000138719	0.00025356	1.63956e-08	1.63956e-08	0.000277778	0.000305432	1.63956e-08	0.00167047	0.00025279	1.63956e-08	0.0166766	1.63956e-08	0.00276037	1.63956e-08	1.63956e-08	0.000685123	0.00023063	0.000172038	0.000681813	0.0108736	0.000586737	0.000563506	0.0043857	1.63956e-08	1.63956e-08	1.63956e-08	1.63956e-08	1.63956e-08	0.000336428	0.00168341	1.63956e-08	0.000746323	0.00894457	0.00128535	0.000802369
[truncated: 56 more columns]
